1

2

3 **Structural specialities, curiosities and record-breaking features of**  
4 **crustacean reproduction**

5

6 **Günter Vogt**

7 *Faculty of Biosciences, University of Heidelberg, Im Neuenheimer Feld 230, 69120*

8 *Heidelberg, Germany*

9

10

11 E-mail: [gunter.vogt@web.de](mailto:gunter.vogt@web.de)

12

13 **ABSTRACT**

14

15 Crustaceans are a morphologically, physiologically and ecologically highly diverse animal  
16 group and correspondingly diverse are their reproductive characteristics. They have evolved  
17 structural specialities with respect to penis construction, sperm form, sperm storage, mode of  
18 fertilization and brood care. Unique in the animal kingdom are safety lines that safeguard  
19 hatching and first moulting of the offspring. Further curiosities are dwarf males in parasitic  
20 and sessile species and the induction of feminization, castration and gigantism by parasites  
21 and bacteria. Record-breaking features are relative penis length, clutch size, sperm size,  
22 chromosome number, viability of resting eggs and fossil ages of penis, sperm and brooded  
23 embryos. This article reviews and illustrates these structural reproductive peculiarities and  
24 curiosities and discusses implications for basic and applied biological topics including sperm  
25 competition, posthumous paternity, fitness enhancement of the young, reconstruction of  
26 pristine ecosystems prior to man-made pollution, population change by infectious  
27 feminization and sustainable male-based fishery.

28

29 *Key words:* Crustacea, penis, sperm, multiple paternity, brood care, safeguarding of hatching,  
30 infectious feminization, gigantism, dwarf males, diapause, fossils.

31

32 **CONTENTS**

33 I. Introduction

34 II. Extensible versus permanently stiff copulatory organs

35 III. Giant sperm and explosion sperm

36 IV. Sperm storage and paternity

37 V. Gelatinous fertilization tent

38 VI. Brooding compartments for posthatching stages

39 VII. Safety lines for safeguarding of hatching and first moult

40 VIII. Dwarf males

41 IX. Feminization, castration and gigantism

42 X. Record-breaking clutch size and chromosome number

43 XI. Record-breaking viability of diapausing eggs

44 XII. Record-breaking fossil ages of reproductive structures

45 XIII. Conclusions

46 XIV. Acknowledgements

47 XV. References

48

## 49 **I. INTRODUCTION**

50

51 Crustacea is a phylogenetically very old animal group that is renowned for its exceptional  
52 diversity in morphology, physiology, life history and ecology. The crustaceans date back to  
53 the Early Cambrian some 520 million years ago and thus had ample time for experimentation  
54 with form and function (Sepkoski, 2000; Harvey *et al.*, 2012). They include six classes, 42  
55 orders, 849 extant families and more than 52,000 described species (Martin & Davis, 2001).  
56 Maximum body length of the adults ranges from about 0.1 mm in a tantulocarid ectoparasite  
57 to more than 1 m in the American lobster (including chelae). Crustaceans occur in marine,  
58 limnic and terrestrial habitats from the polar regions to the tropics and from lowlands to high  
59 mountains. Most crustaceans are free living but some taxa are sessile or parasitic (Martin &  
60 Davis, 2001). Because of this enormous diversity there are a lot of special adaptations in this  
61 animal group.

62 The most curious adaptations in the animal kingdom have evolved in context with  
63 reproduction, particularly with respect to behaviour. Examples are the sexual cannibalism in  
64 praying mantis females, which sometimes eat the males during mating (Lawrence, 1992), and

65 brooding in megapodid birds, which incubate their eggs by heat generated from microbial  
66 decomposition or volcanism (Dekker & Brom, 1992). However, there are also reproductive  
67 specialities and curiosities related to morphology and anatomy such as the antlers of deer  
68 (Price *et al.*, 2005), the love darts of gastropods (Chase & Blanchard, 2006) or the occurrence  
69 of three vaginas in kangaroos (Dawson, 1995).

70 The present article highlights structural specialities, curiosities and record-breaking  
71 features of reproduction in crustaceans and emphasizes their impact on general biological  
72 issues. The topics discussed include inflatable and permanently stiff copulatory organs, giant  
73 sperm and explosion sperm, safeguarding of hatching and first moult by safety lines,  
74 manipulation of sex and body size by parasites, and records in relative penis length,  
75 chromosome number, viability of resting eggs and fossil ages of reproductive structures.

76

## 77 **II. EXTENSIBLE VERSUS PERMANENTLY STIFF COPULATORY ORGANS**

78

79 Most crustaceans transfer sperm by copulatory organs. This evolutionary legacy has led to  
80 some curiosities in sessile and parasitic groups as explained further down. In this chapter, I  
81 want to compare two different construction principles of copulatory organs, the extensible  
82 hydraulic penis in sessile Cirripedia and the form-invariant and permanently stiff copulatory  
83 organs in Decapoda.

84 Cirripedia are among the few sessile animals that use a penis for sperm transfer (Fig. 1A-  
85 C) (Barnes, 1992). They are hermaphrodites but usually do not fertilize themselves. Their  
86 unpaired penis is greatly extensible and well suited for sweeping movements to search for  
87 functional females in the surroundings (Fig. 1B). It is extended and retreated by modulation of  
88 the turgor pressure in the longitudinally running inflatable haemolymph channels (Fig. 1D)  
89 (Klepal *et al.*, 1972). The cuticle of the penis is thin and annulated (Fig. 1C, D) facilitating  
90 length variation and its structure is highly complex combining mechanical strength with

91 flexibility (Klepal *et al.*, 2010). Searching movements are enabled by a compact layer of  
92 longitudinal musculature underneath the epidermis (Fig. 1D) (Klepal *et al.*, 1972). Circular  
93 musculature is only found around the central ductus ejaculatorius, which serves for sperm  
94 ejection (Klepal *et al.*, 1972). The anterior portion of the penis is studded with rows of  
95 sensory setae (Fig. 1C), which are assumed to help in the identification of females.

96 Most intertidal barnacles have a brief reproductive season and only fully develop a  
97 functional penis during this period (Barnes, 1992; Klepal *et al.*, 2010). For example, in New  
98 York populations of *Semibalanus balanoides*, which reproduce in late October and early  
99 November, the penis grows rapidly to its maximum size over September and October and  
100 degenerates during November (Horch, 2009). Interestingly, intertidal barnacles can change  
101 the size and shape of their penises to suit local hydrodynamic conditions as shown for  
102 *Balanus glandula* and *Semibalanus balanoides* (Neufeld & Palmer 2008; Horch, 2009). On  
103 wave-exposed shores, they develop shorter penises with greater diameters than in wave-  
104 protected sites. In *Balanus glandula*, penis mass corrected for body size was 16% higher in  
105 the most exposed site when compared with the most protected site (Neufeld & Palmer, 2008),  
106 suggesting that exposed barnacles invest more energy and resources in penis development and  
107 function. Transplant experiments between wave-exposed and protected sites revealed  
108 phenotypic plasticity as the cause of penis variation rather than differential settlement or  
109 selective mortality (Neufeld & Palmer 2008; Horch, 2009). The unusual plasticity of barnacle  
110 penises identifies an environmental factor as driver of genital diversification in animals aside  
111 of female choice, sexual conflict and male-male competition (Neufeld & Palmer, 2008).

112 Cirripeds are the record holders in relative penis length. For example, the penis of  
113 *Cryptophialus minutus* is eight times longer than its body size (Neufeld & Palmer, 2008). The  
114 resting penis of *Semibalanus balanoides* is 8–13 mm long, depending on size of the animal,  
115 and can be stretched to about four times its resting length (Klepal *et al.*, 1972).

116 A totally different construction of the copulatory organs is found in the Decapoda. Most  
117 members of this order of vagile and rather big-sized crustaceans have permanent and form-  
118 invariant copulatory organs (Factor, 1995; Holdich, 2002; Becker *et al.*, 2012). In freshwater  
119 crayfish and brachyuran crabs each of the paired copulatory organs is composed of the first  
120 and second gonopods (Fig. 1E, F), which serve different functions. The first gonopod forms a  
121 tube-like structure (Fig. 1G) that takes the sperm from the genital opening. Unlike in the  
122 cirriped penis, there is no ductus ejaculatorius in these copulatory organs. For sperm transfer,  
123 the second gonopod is inserted into the tube of the first gonopod (Fig. 1F) and acts like a  
124 plunger that produces spermatophores of appropriate size and pushes them into the female  
125 storage site (Holdich, 2002; Becker *et al.*, 2012). The form constancy and permanent stiffness  
126 of both gonopods is achieved by particularly thick cuticles (Fig. 1G) (Brandis *et al.*, 1999;  
127 Ewers-Saucedo *et al.*, 2015). The complex structure and form-invariance qualify the  
128 gonopods for taxonomic purposes. For example, in cambarid crayfish the morphology of the  
129 gonopods is so specific that it is the main criterion for species identification (Hobbs, 1989).

130

### 131 **III. GIANT SPERM AND EXPLOSION SPERM**

132

133 Crustacea have evolved an enormous variety of sperm forms and fertilization mechanisms  
134 (Jamieson, 1991). A few groups show the classical sperm morphology consisting of a head  
135 and a flagellum but most groups have a derived sperm structure. Here, I want to present the  
136 two most curious types, the giant sperm of Ostracoda and the explosion sperm of Decapoda.

137 Ostracods of the superfamily Cypridoidea have some of the longest sperm in the animal  
138 kingdom, surpassed only by a few insects. Sperm length in cypridoidean species ranges from  
139 268  $\mu\text{m}$  to 11.8 mm (Fig. 2A, B) and from 0.33 to 4.3 times the carapace length of the  
140 producing male (Smith *et al.*, 2015). The record holder in the animal kingdom is the fly  
141 *Drosophila bifurca*, which produces sperm of 58.2 mm, which is 20 times longer than the

142 specimens that manufacture them (Pitnick *et al.*, 1995). However, in contrast to insect giant  
143 sperm, in which most of the length is accounted for by exceptionally long flagella, ostracod  
144 sperm are aflagellate and represent an extremely elongated sperm-head. The nucleus runs  
145 from one end to the other and is partially encased by two enormous, spiralling mitochondria  
146 (Fig. 2C, D). Although tailless, these spermatozoa are motile because contractile elements can  
147 produce longitudinal rotation of the entire sperm (Matzke-Karazs *et al.*, 2014). During  
148 fertilization the entire spermatozoon enters the egg although even the shortest giant sperm is  
149 five times as long as the diameter of the corresponding egg (Matzke-Karazs, 2005).

150 The spermatozoa of the Decapoda Reptantia, which include freshwater crayfish, lobsters  
151 and crabs, are called "Explosionsspermien" (explosion sperm) in the German literature. Like  
152 the sperm of other decapods they are aflagellate and nonmotile (Jamieson, 1991; Tudge &  
153 Koenemann, 2009) but can achieve an abrupt short-term motility by a special acrosomal  
154 reaction. Reptantian sperm are composed of a compact main body consisting of the nucleus  
155 and acrosome and radial arms (Fig. 2E) (Brown, 1966; Talbot & Chanmanon, 1980a; López-  
156 Camps *et al.*, 1981; Vogt, 2002). The radial arms are rich in microtubules and become free  
157 shortly before fertilization when the spermatozoa are released from the spermatophore  
158 (Niksirat *et al.*, 2014).

159 The acrosomal reaction is characterized by an abrupt eversion of the acrosome, which  
160 causes a leap-like forward movement (Fig. 2F, G) (Talbot & Chanmanon, 1980b). In vitro  
161 induction of sperm reaction in the lobster *Homarus americanus* and video microscopy  
162 revealed a reaction time from 0.66 to 5.16 seconds (Tsai & Talbot, 1993). The acrosomal  
163 reaction occurred in two phases, eversion of the acrosome and forward tearing of the nucleus.  
164 It propelled the entire sperm forward about 18  $\mu\text{m}$  (Fig. 2F) (Tsai & Talbot, 1993). The force  
165 generated by the acrosome reaction is sufficient to push the sperm nucleus through the egg  
166 coat as shown for lobster (Fig. 2H) and crabs (Brown, 1966; Goudeau, 1982; Talbot *et al.*,  
167 1991).

168

#### 169 **IV. SPERM STORAGE AND PATERNITY**

170

171 Multiple paternity seems to be widespread in Crustacea. It is mainly known for Decapoda but  
172 there are also examples for Isopoda, Cirripedia and Copepoda (Avisé *et al.*, 2011;  
173 Dennenmoser & Thiel, 2015). Avisé *et al.* (2011) have compiled data on paternity in 11  
174 decapod species including shrimps, crayfish, lobsters and crabs. In nine species, multiple  
175 paternity was proven with the microsatellite technique for between 20-100% of clutches. The  
176 mean number of fathers per clutch and species ranged from 1 to 5.3. The maximum number of  
177 fathers per clutch was 11 in *Caridina ensifera* (Yue & Chang, 2010). Multiple paternity  
178 requires promiscuous behaviour of the females and sperm storage until egg-laying and  
179 fertilization, which can occur weeks, months and even years after the last mating (Jensen &  
180 Bentzen, 2012).

181 Usually, the multiple sires contribute differently to the broods (Dennenmoser & Thiel,  
182 2015). For example, in crayfish clutches fertilized by more than three males, one sire always  
183 dominated the brood by sharing his genes with 50-80% of the offspring (Walker *et al.*, 2002;  
184 Yue *et al.*, 2010). The skewed offspring numbers are the result of cryptic female choice and  
185 sperm competition, which is, among others, dependent on the mode of sperm storage and  
186 sperm mobilization in the females (Birkhead & Pizzari, 2002; Wigby & Chapman, 2004;  
187 Dennenmoser & Thiel, 2015). In decapods, sperm can be stored either externally by the  
188 attachment of spermatophores to the ventral side of the female or internally in specialized  
189 spermathecas and seminal receptacles of the female. In the following, I will present examples  
190 for both types and discuss consequences for paternity.

191 In freshwater crayfish, the spermatophores are either externally attached as in Astacidae  
192 and Parastacidae or stored in an unpaired cuticular spermatheca without luminal connection to  
193 the oviducts as in Cambaridae. Fertilization is generally external (Holdich, 2002). In astacids,



194 the spermatophores are glued to the sternal plate between the genital openings (Fig. 3A) and  
195 to the underside of the tail fan. In multiply mated females, late males may leave the  
196 spermatophores of earlier males untouched or may remove them partly (Fig. 3B, C) or  
197 completely, which significantly influences paternity in the clutch. For example, in  
198 *Austropotamobius italicus*, 33% of the males completely removed the spermatophores of  
199 previous rivals, 63% left intact some of the rivals' spermatophores and 3% simply added their  
200 own sperm (Galeotti *et al.*, 2007). Paternity in species with external sperm storage may also  
201 be incidentally biased by mechanical abrasion of spermatophores during locomotion (Galeotti  
202 *et al.*, 2007). In cambarid crayfish, males transfer the sperm into the annulus ventralis and  
203 then close the opening with a sperm plug (Galeotti *et al.*, 2012). Such plugs seem to secure  
204 the sperm in the spermatheca rather than block insemination by later males as may be deduced  
205 from the high frequency of multipaternity in clutches of cambarids (Walker *et al.*, 2002; Yue  
206 *et al.*, 2010; Kahrl *et al.*, 2014).

207 In brachyuran crabs, some species are primarily unipaternal and others are primarily  
208 multipaternal (Avisé *et al.*, 2011; Dennenmoser & Thiel, 2015). This feature seems to depend  
209 mainly on the species-specific mode of sperm storage and sperm competition. In  
210 eubranchyurans, the sperm is deposited in paired ventrally located seminal receptacles that are  
211 continuous with the oviducts and the vaginas (Fig. 3D) (Becker *et al.*, 2011; McLay & López  
212 Greco, 2011; Pardo *et al.*, 2013). The oocytes are fertilized in a fertilization area close to the  
213 opening of the oviduct (Fig. 3D) (Becker *et al.*, 2011; McLay & López Greco, 2011). Since  
214 the spermatozoa are non-motile the sperm stored closest to the fertilization area have the  
215 highest chance to fertilize the eggs. Principally, males have two possibilities aside of female  
216 guarding to ensure dominance over the next clutch. They could either remove the sperm of  
217 preceding rivals from the seminal receptacle by the intromittent organ or displace it to an  
218 unfavourable position and seal it off. Beninger *et al.* (1991) have advocated for the first  
219 alternative because the male gonopods of some crabs have recurved spoon-like tips with

220 swap-like bundles of setae (Fig. 3G) resembling the male genitalia of insects for which sperm  
221 removal is proven (Waage, 1979; Tsuchiya & Hayashi, 2014). However, until now there is no  
222 experimental proof for active sperm removal of predecessors in brachyurans.

223 In contrast, the alternative possibility to gain last-male precedence by ejaculate  
224 stratification and sealing (Fig. 3E, F) is proven for several brachyuran species (Diesel, 1990;  
225 Urbani *et al.*, 1998; Sainte-Marie *et al.*, 2000; Pardo *et al.*, 2013). For example, in spider crab  
226 *Inachus phalangium* the last male to mate displaces the ejaculate of his predecessor dorsally  
227 towards the apex of the receptacle and seals it off with a hardening sperm gel. He then places  
228 his own sperm closest to the oviduct opening. Similar observations were made in the  
229 laboratory in multiply mated snow crab *Chionoecetes opilio*, in which the last male was  
230 mostly the only father of the clutch (Urbani *et al.*, 1998). Stratification and sealing of the  
231 sperm packages of rivals seems to be more effective in some species than in others (Sainte-  
232 Marie *et al.*, 2000; Pardo *et al.*, 2013; Rojas-Hernandez *et al.*, 2014) but even in the most  
233 effective species stratification occasionally fails, particularly if the fresh ejaculate is large in  
234 volume, resulting in multiple paternity in otherwise unipaternal species (Sainte-Marie *et al.*,  
235 2000; Jensen & Bentzen, 2012).

236 The mode of sperm storage and related sperm competition has considerable consequences  
237 for population biology, ecology and fisheries. In long-lived species like clawed lobsters and  
238 some crabs, sperm can be stored across moults and be utilized for years (Factor, 1995; Jensen  
239 & Bentzen, 2012; Pardo *et al.*, 2013). This is made possible by sperm storage in mesodermal  
240 sectors of the seminal receptacles that are not shed during ecdysis (Becker *et al.*, 2011; Pardo  
241 *et al.*, 2013). For example, in the Tanner crab *Chionoecetes bairdi* females isolated from  
242 males after copulation produced viable eggs by 100% in the mating year and 97% and 71% in  
243 the following two years (Paul, 1984). In such species, males that die or are captured soon after  
244 copulation can contribute to the gene pool of the population even years later (posthumous  
245 paternity). In exploited species, in which males are selectively fished, long-term storage of

246 sperm from multiple mates is thought to contribute to the viability and genetic diversity of  
247 populations and may even be essential for a sustainable fishery (Sainte-Marie *et al.*, 2008;  
248 Pardo *et al.*, 2013).

249

## 250 **V. GELATINOUS FERTILIZATION TENT**

251

252 Freshwater crayfish produce a gelatinous tent-like structure for fertilization of the eggs and  
253 their attachment to the pleopods. This tent is formed by the females immediately before egg  
254 laying by a secretion from the glair glands and disrupted and shed several hours later when  
255 the fertilized eggs are firmly glued to the pleopods. Glair glands and fertilization tent are  
256 shared by all crayfish families, the Astacidae, Cambaridae and Parastacidae.

257 Glair glands develop in the weeks before spawning (Thomas & Crawley, 1975) and are  
258 good indicators of forthcoming egg-laying. They appear as creamy-white patches on the last  
259 thoracic sternal plates, the sterna of the abdomen, the inner sides of the pleura, the pleopods  
260 and the uropods of the female. In the final stage of development they are so prominent that  
261 they can even be seen from the dorsal side (Fig. 4A). The glair glands are structurally  
262 different from other integumental glands and terminate with many pores on the underside of  
263 the thorax and pleon (Andrews, 1904; Thomas & Crawley, 1975).

264 Prior to egg laying, crayfish form a pouch by bending the pleon towards the underside of  
265 the cephalothorax. This pouch is then filled with a gelatinous secretion from the glair glands  
266 (Fig. 4B), which lasts about 30 minutes in *Orconectes limosus* (Andrews, 1906). Lying on her  
267 back, the female then releases the eggs into the glair and fertilizes them by sperm that is  
268 mobilized from the externally attached spermatophores or the *annulus ventralis* (Mason,  
269 1970; Gherardi, 2002). Egg laying takes about 10-30 min in *Orconectes limosus* but may last  
270 for hours in other species (Andrews, 1904). The inner mass of the glair is rather fluid but at  
271 the contact zones with the water it forms a more rigid parchment-like structure resembling the

272 flysheet of a tent. Within this tent-like structure the eggs are transferred backwards by gravity  
273 and paddling movements of the pleopods to be fastened to the oosetae of the pleopods. The  
274 attachment process then requires repeated sideward turnings, which usually lasts several hours  
275 (Andrews, 1904, 1906; Mason, 1970).

276 The function of the fertilization tent is probably manifold. It may protect the freshly laid  
277 eggs that are soft and highly labile from the osmotic stress of fresh water and may provide an  
278 optimal milieu for fertilization. The eggs achieve their typical round shape and rigid  
279 consistency only after formation of the outermost shell layer during attachment to the  
280 pleopods (Andrews 1904, 1906). Another possible function of the fertilization tent is the  
281 mechanical confinement of the eggs to the brood pouch during the complicated and time-  
282 consuming attachment procedure. This idea is corroborated by the generally very low loss of  
283 eggs at this time and the observation that the eggs are not properly attached and decay rapidly  
284 if the fertilization tent is damaged.

285 Glair glands and fertilization tents occur in all crayfish species independent of whether  
286 they store sperm externally or internally. They are absent in the marine lobsters, the closest  
287 relatives of freshwater crayfish (Factor, 1995) and may therefore represent a special  
288 adaptation to reproduction in fresh water. However, the other freshwater decapods lack this  
289 fertilization tent too, even the freshwater shrimps and aeglids that have external fertilization  
290 like the crayfish (Chow *et al.*, 1982; Almerão *et al.*, 2010). Therefore, the fertilization tent has  
291 to be regarded as a special characteristic of freshwater crayfish, which has evolved in the stem  
292 group that invaded fresh water from the marine environment.

293

## 294 **VI. BROODING COMPARTMENTS FOR POSTHATCHING STAGES**

295

296 The simplest pattern of reproduction in Crustacea is the release of eggs and sperm into the  
297 water (broadcasting strategy) and larval development in the plankton. However, most

298 crustacean groups have evolved mechanisms to brood their embryos, larvae or even the first  
299 juvenile stages on or in the body of the female (Gruner, 1993; Thiel, 2000, 2003). In some  
300 clades, for instance in the Peracarida, parental care is obligatory and morphologically so  
301 specific that it can be used as a character for phylogenetic analysis (Richter & Scholtz, 2001).  
302 In other lineages like the Euphausiacea, brood care is limited to a fraction of the species only  
303 (Gómez-Gutiérrez, 2003). Here, I focus on brooding of the offspring in or on the body of the  
304 mother requiring specific structural adaptations. Information on brood care in dwellings that is  
305 based more on behavioural interactions of mother and offspring is found in reviews by Thiel  
306 (2003, 2007) and Vogt (2013).

307 The simplest type of brood care is carrying of the eggs on the mother until hatching of the  
308 nauplius larva. Examples are the Euphausiacea among the higher crustaceans (Malacostraca)  
309 and the Copepoda among the lower crustaceans ("Entomostraca"). Both groups include  
310 broadcasting and sac-spawning species. Species of the krill genera *Nyctiphanes* and  
311 *Nematoscelis* brood their eggs in a membranous sac on the thoracopods (Fig. 5A) (Gómez-  
312 Gutiérrez, 2003) whereas cyclopoid and some calanoid copepods carry the eggs in  
313 membranous sacs on the urosome (Fig. 10I) (Kiørboe & Sabatini, 1994).

314 Brooding of embryos and posthatching stages in dorsal brood chambers is typical of some  
315 entomostracan groups like the Cladocera (Fig. 5B) and Ostracoda (Fig. 11G). In cladocerans,  
316 the brood chamber is the space between the dorsal side of the trunk and the carapace. The  
317 eggs are laid in this pouch (Fig. 10A) and the embryos develop until a miniature adult is  
318 released (Fig. 5B) (Mittmann *et al.*, 2014). Some cladocerans with small eggs secrete a fluid  
319 rich in nutrients into this chamber, which may be absorbed by the eggs and developing  
320 embryos (Schminke, 2007). Interestingly, a dorsal brood pouch is also found in the  
321 Thermosbaenacea, which raise the embryos and four posthatching stages in this chamber  
322 (Olesen *et al.*, 2015). This type of brood care is exceptional among the Malacostraca, which  
323 normally brood their offspring on the ventral side of the body (Fig. 5C, E).

324 Like all Peracarida, the isopods have a ventral brood chamber that is delimited by the  
325 oostegites, which are specialized parts of the thoracopods (Fig. 5C) (Csonka *et al.*, 2015).  
326 This marsupium probably evolved for mechanical protection of eggs and developing embryos  
327 in the sea but has become particularly important for colonization of the land (Hoese &  
328 Janssen, 1989). In terrestrial Isopoda, this chamber serves as a micro-aquarium to raise the  
329 developmental stages. It contains cotyledons (Fig. 5C) that secrete the marsupial fluid and  
330 probably supply the young with nutrients. The latter possibility was inferred from the  
331 presence of lipid globules in the cotyledons (Fig. 5C) and the continuity of these organs with  
332 the lipid storing fat body of the mother (Hoese & Janssen, 1989).

333 In the Decapoda, the simplest type of brood care is carriage of the eggs until hatching. It  
334 is rare in Dendrobranchiata, the basal subclass of the Decapoda, but obligatory in the derived  
335 Pleocyemata. Dendrobranchiate shrimps usually broadcast eggs and sperm and only the  
336 pelagic *Lucifer* species carry their eggs on the 3rd thoracopods until the nauplii emerge (Lee  
337 *et al.*, 1992). The pleocyemates brood their eggs on the pleopods at least until hatching of the  
338 zoea larva. Egg carriage can be as long as 16 months as shown for the American lobster  
339 *Homarus americanus* (Goudeau *et al.*, 1987), and therefore, egg attachment must be very  
340 firm. This requirement is fulfilled by a special egg attachment system that consists of a rigid  
341 egg envelope, a firm but elastic egg stalk and the oostetae that arise laterally from the  
342 pleopods. This highly effective egg attachment system presumably originated in the common  
343 ancestor of the Pleocyemata some 430 million years ago (Porter *et al.*, 2005).

344 In many Pleocyemata, carriage of the young is extended to the larval stages or even to the  
345 juveniles. For example, in freshwater crayfish the juveniles are brooded on the pleopods (Fig.  
346 5E) at least until the first feeding stage, which is juvenile stage 3 in cambarids. However, if  
347 shelters are scarce the brooding period is prolonged (Vogt, 2013). Brood care in freshwater  
348 crayfish includes special structural adaptations that secure the young to the mother during  
349 hatching and the first moult as discussed in detail in the next chapter. Other decapod examples

350 of brood care extension until the juvenile stage are the freshwater crabs and aeglid anomurans.  
351 In these freshwater inhabitants, the brooded stages are carried on the pleopods and are  
352 protected in a ventral pouch that is formed by forward folding of the pleon under the  
353 cephalothorax. An exceptional case of brood care in the Decapoda is the terrestrial crab  
354 *Geosesarma notophorum*, which carries the juveniles on top of the carapace covered by a film  
355 of water (Fig. 5D) (Ng & Tan, 1995).

356 Brooding decapods provide protection and grooming but usually do not feed the young,  
357 although the offspring may sometimes participate in the maternal meal. The main advantage  
358 of brood care is the increased survival and growth of the young (Clutton-Brock, 1991).  
359 Disadvantages are the higher energy expenditure of the caring mothers and the pronounced  
360 reduction of egg number in brooding species (Anger, 2001; Vogt, 2013). Therefore, this life  
361 history strategy should be favoured only under specific circumstances. The Decapoda are  
362 particularly suitable to examine this issue in depth because they include non-brooders and  
363 brooders of different degrees and have evolved extended brood care independently in several  
364 lineages. Interestingly, brooding until the juvenile stage was convincingly demonstrated for  
365 less than 30 species of the ~12,000 marine decapods (mainly from polar regions and harsh  
366 coastal environments) but is supposed to occur in about 70% of the ~3,000 species of  
367 freshwater decapods (Vogt, 2013). This imbalance suggests that extended brood care was  
368 mainly selected for in environments with heavily fluctuating nutritional and abiotic conditions  
369 (Anger, 2001; Vogt, 2013).

370

## 371 **VII. SAFETY LINES FOR SAFEGUARDING OF HATCHING AND FIRST MOULT**

372

373 Freshwater crayfish have evolved effective safety lines, the telson thread and anal thread, to  
374 secure the brooded offspring during the immobile and helpless phases of hatching and first  
375 moult, respectively. At other times the juveniles can actively hold on to their mother with

376 terminal hooks on the chelipeds (Vogt & Tolley, 2004; Vogt, 2008). Such safety lines are  
377 unique in the animal kingdom and have probably evolved during colonization of fresh water  
378 by the stem group of crayfish (Scholtz & Kawai, 2002; Vogt, 2013).

379 The telson thread occurs in all crayfish families (Andrews, 1907; Scholtz, 1995; Vogt &  
380 Tolley, 2004). It emerges during hatching and probably originates from two sources, a  
381 secretion and the detaching inner layer of the egg case. The telson thread extends from the  
382 posterior end of the telson of the hatchling to its egg case, which persists on the pleopods after  
383 hatching (Fig. 6A, B). During eclosion it keeps the helpless hatchling passively secured to the  
384 mother (Fig. 6A) preventing it from being dislodged by the water current. Thereafter, it  
385 secures the hatchling during its attempts to hook into pleopodal structures of the mother  
386 (Vogt, 2008).

387 The anal thread occurs only in the Cambaridae and Parastacidae. It is composed of  
388 cuticular material and originates from delayed moulting of the hindgut (Scholtz, 1995;  
389 Rudolph & Rojas, 2003; Vogt, 2008). During moulting of the hatchling it keeps the emerging  
390 stage-2 juvenile passively linked to its exuvia (Fig. 6C), which itself remains hooked into  
391 pleopodal structures of the mother. In vitro tests revealed that this curious anal thread-exuvia-  
392 pleopod connection is firm enough to protect the freshly moulted juveniles from being washed  
393 away (Vogt, 2008). After some hours, the anal thread is disconnected by flapping movements  
394 of the juveniles, which are now attached to the maternal pleopods by their peraeopodal hooks  
395 (Vogt, 2008). A special situation is found in the parastacid species *Astacopsis gouldi* and  
396 *Astacopsis franklinii* which secure three juvenile stages by anal threads (Hamr, 1992).

397

## 398 **VIII. DWARF MALES**

399

400 Dimorphism between females and males is common in crustaceans and results from  
401 secondary sex characteristics related to sperm transfer and brood care. The larger sex is



402 sometimes the female and sometimes the male. An extreme form of sexual dimorphism is the  
403 reduction of males to dwarf males, which has independently evolved in sessile cirripeds and  
404 parasitic isopods, copepods and cirripeds. Dwarf males are much smaller than females of the  
405 same species and are usually equipped with special structures to hold on the female. Their  
406 internal organs except of the gonads are reduced to different degrees, depending on taxon.  
407 The advantage of dwarf males is the permanent availability of males at a relatively low  
408 physiological cost under conditions of limited mating opportunities (Vollrath, 1998).

409 In isopods, dwarf males are typical of the ten families of the Bopyroidea and  
410 Cryptoniscoidea, which parasitize on other crustaceans from shallow waters to the deep sea.  
411 These families comprise 795 species or 7.7% of all isopods and have a shared evolutionary  
412 history with their hosts dating back to the Jurassic (Williams & Boyko, 2012). The males  
413 reside on the females but their feeding biology is largely unknown. An example is the bopyrid  
414 *Pseudione overstreeti* (Fig. 7A) that infests the branchial chamber of the Mexican ghost  
415 shrimp *Callichirus islagrande* (Adkison & Heard, 1995). The greatest total length of the  
416 females is 19.1 mm and the greatest width is 14.4 mm. In males, the corresponding values are  
417 4.9 mm and 2.3 mm, respectively. The male usually attaches to the ventral side of the female's  
418 pleon. In the dajid *Zonophryxus quinquedens*, which parasitizes on the carapace of the deep  
419 sea Antarctic shrimp *Nematocarcinus longirostris*, the females and males have maximum  
420 lengths of 20 mm and 4.5 mm, respectively (Brandt & Janssen, 1994). The dwarf males live  
421 on the underside of the attached female (Fig. 7B).

422 In sessile Cirripedia, which are basically hermaphrodites, dwarf males have evolved  
423 several times probably because of the limited opportunity to find sexual partners and to reach  
424 them with the penis for insemination (Yusa *et al.*, 2012). An example is the pedunculate  
425 gooseneck barnacles, which show a broad diversity of sexual systems including simultaneous  
426 hermaphroditism, the coexistence of hermaphrodites and dwarf males (androdioecy) and the  
427 combination of pure females and dwarf males (dioecy) (Yusa *et al.*, 2012). Androdioecy

428 occurs in shallow-water species that live in large groups and dioecy occurs in the deep sea and  
429 in symbiotic species. In the androdioecious *Scalpellum scalpellum* two to five dwarf males are  
430 usually attached to a large hermaphrodite. In the deep sea species *Trianguloscalpellum regium*  
431 that depends entirely on the presence of dwarf males for fertilization the dwarf males are very  
432 small and are attached to the female in groups located in a specific receptacle inside the scutal  
433 edge (Fig. 7C).

434 The rhizocephalan cirripeds are endoparasites in marine Decapoda. The body of the  
435 female is composed of two parts, a root-like interna that penetrates the host organs and serves  
436 for the absorption of nutrients and a sac-like externa that is located on the host's pleon and  
437 serves for reproduction. The eggs in the externa are fertilized by the sperm of dwarf males.  
438 These can invade the mantel cavity of the female as a very small trichogon of only 200  $\mu\text{m}$  in  
439 length that develops from the cypris larva. The trichogons migrate to specific receptacles  
440 close to the ovaries, moult at the entrance of the receptacle and seal it with the shed cuticle.  
441 Therefore, each of the two receptacles of a female is inhabited by a single trichogon only,  
442 which produces sperm and remains together with the female until the end of life (Hoeg, 1991;  
443 Schminke, 2007). In species with closed mantles, dwarf males attach to the outside of the  
444 mantle and inject spermatogonia through their antennae into the mantle cavity. Depending on  
445 species, these spermatogonia settle then in the receptacles or form balls of spermatogonia that  
446 float in the mantle cavity to produce sperm (Hoeg, 1991; Schminke, 2007).

447 Several families of parasitic copepods have evolved dwarf males, which are many times  
448 smaller than their corresponding females (Østergaard & Boxshall, 2004). In the  
449 Chondracanthidae, a family parasitic on marine fishes, the males attach to immature females  
450 at the second copepodite stage, complete their development on the female and remain there  
451 until they die. A maximum of eight males on a single female has been recorded but in most  
452 members of the family adult females rarely have more than one male attached. An example is  
453 *Chondracanthus lophii*, in which tiny males adhere near the female genital apertures to so-

454 called nuptial organs (Fig. 7D), which are special structures for holdfast and probably  
455 nourishment. The males use the claws on the transformed antennae (Fig. 7E) for attachment.  
456 The pinecone-like nuptial organs (Fig. 7F) contain glandular tissue and are assumed to  
457 produce a secretion to nourish the males. Adult males have well developed mouthparts (Fig.  
458 7E) and a functional oesophagus and midgut but no anus, suggesting that they feed on easily  
459 digestible stuff like mucous produced by the female (Østergaard, 2004; Østergaard &  
460 Boxshall, 2004).

461

## 462 **IX. FEMINIZATION, CASTRATION AND GIGANTISM**

463

464 Parasitic crustaceans and microorganisms can significantly change the reproductive biology  
465 of crustacean hosts by manipulating sex or causing infertility. The latter is sometimes  
466 paralleled by gigantism promoting multiplication of the parasite.

467 Parasitic isopods and cirripeds are well known for their ability to cause feminization or  
468 infertility of their crustacean hosts (Schminke, 2007; Williams & Boyko, 2012). For example,  
469 in the ghost shrimp *Callichirus islagrande* the reproductive activity is obviously suppressed  
470 when infected with the bopyrid *Pseudione overstreti*. In all of the more than 100 host-  
471 parasite associations investigated, the gonads of the hosts were greatly reduced (Adkison &  
472 Heard, 1995). Moreover, since only female shrimp were found to be infested some female  
473 morphotypes may represent primary males that have changed sex after parasitic manipulation  
474 (Adkison & Heard, 1995). Among the parasitic isopods some bopyrids and dajids and all  
475 entoniscids and Cryptoniscoidea are assumed to be parasitic castrators of their hosts  
476 (Williams & Boyko, 2012).

477 A well-known bacterial manipulator of crustacean reproduction is the intracellular alpha-  
478 proteobacterium *Wolbachia pipientis*. Bouchon *et al.* (1998) detected this bacterium in 19  
479 species from eight terrestrial isopod families and in one limnic and two estuarine isopod

480 species. Meanwhile, it was also found in a limnic amphipod and a marine gooseneck barnacle  
481 (Cordaux *et al.*, 2012). *Wolbachia* was shown to be able to induce feminization in isopods by  
482 converting genetic males into functional females (Juchault *et al.*, 1992; Rigaud *et al.*, 1997,  
483 2001). However, not all infected males are transformed into females. Transinfection  
484 experiments established that the susceptibility or resistance to sex conversion depends much  
485 on the combination of host species and *Wolbachia* strain (Cordaux *et al.*, 2004). *Wolbachia* is  
486 usually vertically transmitted via the egg cytoplasm but some horizontal transmission has also  
487 occurred as demonstrated by genetic analysis. This mode of transmission may explain the  
488 occurrence of *Wolbachia* in highly diverse crustacean groups and "infectious feminization"  
489 may threaten the genetic diversity of wild populations.

490 A good example of castration and the induction of gigantism in a crustacean host is the  
491 *Daphnia magna* – *Pasteuria ramosa* system (Ebert *et al.*, 1996, 2004; Cressler *et al.*, 2014).  
492 *Daphnia* females continue to produce eggs within the first 12 days after infection by the  
493 bacterial manipulator (Ebert *et al.*, 1996) but thereafter, most of the infected individuals are  
494 castrated (Fig. 8A) to direct nutrients and energy towards reproduction of the parasite. By  
495 manipulating food levels during the infection Ebert *et al.* (2004) showed that both antagonists  
496 are resource-limited and that there is a negative correlation between host and parasite  
497 reproduction, indeed. Curiously, a certain proportion of the saved energy is channelled into  
498 growth of the host resulting in gigantism (Fig. 8A). Although illogical at first glance, the  
499 parasite benefits from this resource allocation because it can produce more spores in a bigger  
500 host (Ebert *et al.*, 2004). *Pasteuria ramosa* has a polymorphic life cycle beginning with  
501 cauliflower-like rosettes and ending with individual spores (Fig. 8B). It is horizontally  
502 transmitted through spores that are released from dead host bodies into the water.

503

## 504 **X. RECORD-BREAKING CLUTCH SIZE AND CHROMOSOME NUMBER**

505

506 Crustaceans are among the animals with the highest clutch sizes. Particularly high numbers of  
507 eggs per clutch are produced by brachyuran decapods. Examples are *Metacarcinus anthonyi*  
508 and *Scylla tranquebarica*, which can have 3.8 and 5 million eggs per clutch, respectively  
509 (Hines, 1991; Srinivasagam *et al.*, 2000). In the blue crab *Callinectes sapidus*, the eggs are  
510 brooded until hatching of the zoea larvae in a so-called sponge under the pleon (Fig. 9A, B).  
511 The average sponge contains about three million eggs but in large females it was shown to  
512 include up to 8 million eggs (Prager *et al.*, 1990). In some *Cancer* species, the number of eggs  
513 produced per female and lifetime was estimated to more than 20 million (Hines, 1991) but in  
514 *Callinectes sapidus*, which has up to 18 broods (Graham *et al.*, 2012), this value may be  
515 exceeded.

516 The record in chromosome number in animals is hold by the freshwater crayfish  
517 *Pacifastacus leniusculus trowbridgii* with a diploid set of 376 chromosomes (Fig. 9C)  
518 corresponding to a chromosome number of 188 in the gametes (Fig. 9D) (Niiyama, 1962).  
519 The second highest chromosome number was recently found in the triploid crayfish  
520 *Procambarus virginalis* ( $3n=276$ , Fig. 9E) (Martin *et al.*, 2015). *Procambarus virginalis* is the  
521 only obligatory parthenogenetic decapod known (Martin *et al.*, 2015; Vogt *et al.*, 2015). It  
522 reproduces by apomictic parthenogenesis, i. e. without meiosis, and therefore, the eggs should  
523 include 276 chromosomes as well, making *Procambarus virginalis* the new animal world  
524 record holder with respect to chromosome number of gametes.

525 The high chromosome numbers in freshwater crayfish are explained by whole genome  
526 duplication events in their early evolution. The arguments for this assumption come from the  
527 observation that some crayfish species have the double and four-fold chromosome numbers of  
528 others (Lécher *et al.*, 1995; Martin *et al.*, 2015) and the generally exceptionally high polyploid  
529 index in Decapoda (Otto & Whitton, 2000). The decapods have haploid chromosome numbers  
530 ranging from 27 to 188 and a polyploid index of 41.7%. Ancient polyploidization is  
531 particularly supposed for the Astacidea, Palinuridae and Paguroidea (Otto & Whitton, 2000).

532 However, the increase in chromosome number within a lineage is not paralleled by an  
533 increase in genome size, which would contradict the polyploidization hypothesis. For  
534 example, *Astacus astacus* has fewer chromosomes ( $2n=176$ ) than *Orconectes virilis* ( $2n=200$ )  
535 (Martin *et al.*, 2015) but has a much larger genome size (19.64 pg versus 4.69 pg) (Jeffery,  
536 2015), suggesting that high chromosome numbers may at least partly result from evolutionary  
537 chromosome fragmentation.

538

## 539 **XI. RECORD-BREAKING VIABILITY OF DIAPAUSING EGGS**

540

541 Short-lived members of the limnic and coastal marine plankton and ephemeral water bodies  
542 often produce resting eggs that can survive adverse environmental conditions for years  
543 (Radzikowski, 2013). In the Crustacea, such diapausing eggs and cysts are produced by the  
544 Branchiopoda, Copepoda and Ostracoda. Under laboratory conditions resting eggs of the  
545 anostracan *Branchinecta packardi*, the notostracan *Triops longicaudatus* and the  
546 conchostracan *Caenestheriella gynecia* remained viable for a minimum of 16, 14 and 8 years,  
547 respectively (Radzikowski, 2013). Eggs of the cladoceran *Daphnia pulicaria* (Fig. 10A) and  
548 the copepods *Boeckella poppei* and *Onychodiptomus sanguineus* (Fig. 10I) isolated from  
549 accurately dated lake sediments even hatched after 125, 196 and 332 years, respectively  
550 (Hairston *et al.*, 1995; Cáceres, 1998; Jiang *et al.*, 2012). The adaptation of short-lived  
551 animals to adverse and changing environments by resting eggs has apparently evolved in the  
552 earliest metazoans already (Cohen *et al.*, 2009).

553 Crustacean resting eggs can be the result of parthenogenetic or bisexual reproduction,  
554 depending on taxon (Radzikowski, 2013). Cladocerans like *Daphnia* usually produce  
555 subitaneous summer eggs (Fig. 10A) by parthenogenesis and resting winter eggs (Fig. 10B-D)  
556 by sexual reproduction. Resting eggs are usually highly tolerant to environmental stress like  
557 drying, freezing, UV radiation and mechanical damage. For example, the cysts of the

558 anostracan *Artemia franciscana*, a common model of dormancy, can survive prolonged  
559 exposure to temperatures of -271°C and +100°C (Radzikowski, 2013). This stress tolerance is  
560 achieved by protecting coverings that are often shaped and ornamented in a group or species-  
561 specific manner (Fig. 10E-H) (Thiery & Gasc, 1991; Fryer, 1996). These coverings also  
562 permit passage through the guts of birds facilitating dispersal and colonization of isolated  
563 water bodies (Radzikowski, 2013). In some cladocerans, the resting eggs are additionally  
564 enveloped by a cuticular ephippium, which is derived from the carapace (Fig. 10C). Stress  
565 resistance is further provided by cryoprotectants like trehalose and glycerol and molecular  
566 chaperones like heat shock proteins (MacRae, 2010; Radzikowski, 2013).

567       The production of long-lived diapausing eggs in crustaceans is a bet-hedging strategy that  
568 constitutes an ecological and evolutionary reservoir. Mobilization of this reservoir can help  
569 the actual population to respond to environmental changes by enhancing the genetic variation  
570 and species richness (Hairston, 1996; Cáceres, 1998). In Oneida Lake, New York, diapausing  
571 eggs accumulate in the sediments to densities of  $2.5 \times 10^4$  eggs/m<sup>2</sup> for *Daphnia galeata* and  
572  $8.0 \times 10^4$  eggs/m<sup>2</sup> for *Daphnia pulicaria* (Cáceres, 1998). <sup>210</sup>Pb dating of sediments suggests  
573 that these eggs can remain viable for >125 years and that the two *Daphnia* populations have  
574 persisted in the lake for >200 years. Annual emergence rates back to the water column range  
575 between 0 and 25 *Daphnia*/m<sup>2</sup>. Because annual variation in the size of the overwintering  
576 water-column population ranges between 0 and 2.5 individuals/L, the contribution of  
577 emergence to the development of the spring population is considerable in some years and  
578 negligible in others (Cáceres, 1998). In some copepod species, the density of diapausing eggs  
579 is >10<sup>6</sup>/m<sup>2</sup> and their annual mortality rate is approximately 1% (Hairston *et al.*, 1995;  
580 Hairston, 1996).

581       Egg banks of crustaceans are in many ways analogous to the seed banks of terrestrial  
582 plant species (Cáceres, 1998) and are valuable tools for ecological, biogeographical and  
583 evolutionary research. For example, they are useful to reconstruct ancient plankton

584 communities and to study their change over time (Ohtsuki *et al.*, 2015). They also reflect  
585 invasion histories as shown for the introduction and spreading of a parthenogenetic American  
586 *Daphnia pulex* clone in Africa and the subsequent displacement of native *Daphnia pulex*  
587 populations by this clone (Mergeay *et al.*, 2006). Crustacean egg banks were also used to  
588 investigate the influence of man-made eutrophication on plankton communities (Brede *et al.*,  
589 2008). Short-term evolutionary changes of the genotype were studied on the example of the  
590 increasing resistance of *Daphnia galeata* in Lake Constance, Central Europe, to nutritionally  
591 poor and toxic cyanobacteria that drastically proliferated after eutrophication (Hairston *et al.*,  
592 1999).

593

## 594 **XII. RECORD-BREAKING FOSSIL AGES OF REPRODUCTIVE STRUCTURES**

595

596 Ostracod crustaceans provide one of the most complete and consistent fossil records of any  
597 animal group including tens of thousands fossil species dating back to the Ordovician  
598 (Rodriguez-Lazaro & Ruiz-Muñoz, 2012). Usually, only their shells are preserved but in the  
599 last decade some exceptional fossils with soft body parts have been detected. They revealed,  
600 among other things, record-breaking ages of copulatory organs, sperm and brooded embryos.

601 Most ostracods are sexually reproducing and transfer sperm with complex paired  
602 copulatory organs called hemipenes (Fig. 11A) (Mc Gregor & Kesling, 1969; Karanovic,  
603 2012). In an exceptionally well-preserved specimen of the myodocopid *Colymbosathon*  
604 *ecplecticos* from the Lower Silurian of Herefordshire, England, 3-D reconstruction revealed  
605 amazing details of the soft body including a copulatory organ (Siveter *et al.*, 2003). This  
606 ostracod was preserved as a three-dimensional calcite infill in nodules hosted within volcanic  
607 ash. The copulatory organ detected is relatively large and stout (Fig. 11B), projects anteriorly  
608 and has lobe-like distal flanks. With an age of 425 million years it is the oldest penis  
609 documented for any animal.



610 Ostracods of the suborder Cypridocopina are famed for having some of the longest sperm  
611 in the animal kingdom as discussed above. Matzke-Karasz *et al.* (2014) have recently  
612 discovered fossil giant sperm by X-ray synchrotron microtomography in five ostracods (one  
613 male and four females) from the early Miocene of Queensland, Australia. The 16 million  
614 years old specimens belong to the species *Heterocypris collaris* and *Newnhamia mckenziana*.  
615 Giant sperm bundles were found in the seminal vesicles and vasa deferentia of the male (Fig.  
616 11C) and the sperm receptacles of the females. These bundles included spermatozoa of  
617 excellent three-dimensional preservation showing subcellular features such as longitudinal  
618 coiling (Fig. 11D) and spiraling of the sperm nucleus. Other well-preserved reproductive  
619 structures in the male were the paired Zenker organs (Fig. 11E, F), which are chitinous and  
620 muscular pumps that help to transfer the sperm into the females (Yamada & Matzke-Karasz,  
621 2012).

622 The sperm of *Heterocypris collaris* and *Newnhamia mckenziana* are the oldest giant  
623 sperm on record and the third oldest sperm of any animal. Older fossil sperm were found in a  
624 50 million years old annelid cocoon from Antarctica (Bomfleur *et al.*, 2015) and a spring tail  
625 trapped 40 million years ago in Baltic amber (Poinar, 2000). The giant sperm of ostracods are  
626 exceptional in as far as they are considered to have originated only once some 100 million  
627 years ago and have been retained since then, which stands in contrast to the rapid sperm  
628 evolution in other taxa (Smith *et al.*, 2015). Indirect evidence of their occurrence already in  
629 the Cretaceous comes from the detection of Zenker organs (Fig. 11F), which are restricted to  
630 taxa with giant sperm (Matzke *et al.*, 2009). The long history and persistence of giant sperm  
631 in ostracods makes them a unique model to study the evolutionary significance and function  
632 of this unusual sperm type in animals (Matzke-Karasz *et al.*, 2014; Smith *et al.*, 2015).

633 Structures indicative of brood care are only rarely found in invertebrate fossils (Wang *et*  
634 *al.*, 2015). In 2007, Siveter and colleagues detected a 425 million years old myodocopid  
635 ostracod, *Nymphatolina gravida*, in Herefordshire, England, which included 20 ovoid and two

636 valve-shaped structures of a mean length of 558  $\mu$ m in the posterior domiciliar area. These  
637 globules were interpreted as eggs and juveniles in a marsupium-like brood chamber, which is  
638 a unique combination in fossil invertebrates (Siveter *et al.*, 2007). Later, Siveter *et al.* (2014)  
639 found a pyritized ostracod, *Luprisca incuba*, with well preserved embryos in the Upper  
640 Ordovician of central New York State, USA (Fig. 11H). This discovery provides conclusive  
641 evidence of a conserved brood-care strategy within the myodocopid Ostracoda for at least 450  
642 million years (Fig. 11G, H).

643 The oldest crustacean fossil showing structural features of brood care is *Kunmingella*  
644 *maotianshanensis* from the Lower Cambrian Chengjiang Lagerstätte in China aged to 525-  
645 530 million years ago. This specimen belongs to the Bradoriida, an early derivative of the  
646 stem line Crustacea. *Kunmingella* was dorsoventrally flattened and crawling on the surface of  
647 the sediment (Shu *et al.*, 1999). Clusters of rounded bodies of 150  $\mu$ m in diameter were found  
648 in a ventral chamber of the fossil delimited by the post-antennular appendages and their distal  
649 setae (Fig. 11I). These globular bodies are interpreted as brooded embryos, resembling brood  
650 care in the recent phyllocarid *Nebalia bipes*, which has a similar basket-like brood pouch  
651 created by intersecting setae of the thoracic appendages (Shu *et al.*, 1999). Brood care in  
652 *Kunmingella maotianshanensis* suggests that this reproductive strategy dates back to the early  
653 radiation of the Metazoa.

654

### 655 **XIII. CONCLUSIONS**

656

657 (1) Most crustaceans transfer sperm with copulatory organs. These can be either  
658 extensible as in cirripeds or form-invariant as in decapods. The construction of the former  
659 type resembles vertebrate penises. Permanent stiffness in the latter type is achieved by thick  
660 cuticles. In sessile cirripeds, penis length and width can be adapted to population density and  
661 habitat. Their penises are the record-holders with respect to relative size.

662 (2) Sperm structure is very variable in crustaceans. Particularly interesting are the  
663 aflagellate giant sperms of ostracods and the explosion sperms of decapods. The ostracods are  
664 among the record holders with respect to sperm size in animals. The immobile explosion  
665 sperm of lobsters generate leap-like short-term motility by abrupt eversion of the acrosome,  
666 which is sufficient to penetrate the ovarian envelope.

667 (3) Multiple paternity is widespread in decapods. Dominance of the clutch in multiply  
668 mating species is much dependent on the mode of female sperm storage and male strategies to  
669 remove or seal the ejaculates of predecessors (sperm competition). Long-term storage of  
670 sperm in female receptacles for months and years is of particular relevance in commercially  
671 exploited populations, in which gender proportions fluctuate heavily due to selective fishery  
672 of males.

673 (4) Prior to egg-laying, the females of freshwater crayfish produce a unique gelatinous  
674 tent on the underside of their body, which facilitates external fertilization and attachment of  
675 the eggs to the pleopods. Such a fertilization tent is lacking in clawed lobsters, the closest  
676 relatives of crayfish, but is also absent from other freshwater decapods with external  
677 fertilization.

678 (5) Brood care has independently evolved in many groups of the Crustacea. Brooded  
679 embryos, larvae and juveniles are carried either in internal brood pouches or on the  
680 thoracopods and pleopods of the mothers. Unique brooding structures are the cotyledons of  
681 terrestrial isopods that secrete a nutrient-rich fluid and the telson thread and anal thread of  
682 freshwater crayfish that safeguard hatching and the first moult.

683 (6) A most curious phenomenon related to crustacean reproduction is the feminization,  
684 castration and induction of gigantism by parasitic crustaceans and bacteria. These gender  
685 manipulators and reproduction inhibitors can significantly change the dynamics of  
686 populations by transmitting "infectious feminization" among population members.

687 (7) A further curiosity is the occurrence of dwarf males in ecto-parasitic isopods,  
688 copepods and cirripeds and sessile cirripeds from extreme environments. In some copepods  
689 the males are obviously nourished by a secretion from specialized female organs.

690 (8) The highest chromosome numbers in diploid and polyploid animals and animal  
691 gametes were found in freshwater crayfish with 376, 276 and 276 chromosomes, respectively.  
692 This phenomenon is probably the result of polyploidisation and chromosome fragmentation  
693 events during crayfish evolution. The clutch sizes of up to eight million eggs in marine crabs  
694 are record-breaking as well.

695 (9) Some cladocerans and copepods produce resting eggs with record-breaking viabilities  
696 of up to 332 years, providing excellent examples of posthumous parenthood. Egg banks with  
697 dormant eggs enable the investigation of plankton fluctuation over time, the reconstruction of  
698 pristine aquatic ecosystems before man-made pollution, invasion histories, and short-term  
699 genotype changes within species.

700 (10) Crustaceans also hold some records with respect to fossil ages of reproductive  
701 structures. A 425 million years old ostracod copulatory organ is the oldest penis ever found,  
702 16 million years old ostracod sperm is the oldest giant sperm on record and the third oldest  
703 sperm of any animal, and eggs in a marsupium-like chamber of a 525 million years old  
704 crustacean stem line derivative is the oldest evidence of brood care in animals.

705

#### 706 **XIV. ACKNOWLEDGEMENTS**

707 The author is grateful to the following colleagues for providing photographs as indicated in  
708 the figure legends: Carola Becker (Berlin, Germany), Peter G. Beninger (Nantes, France),  
709 Dirk Brandis (Kiel, Germany), Jean-Pierre Claes (Belgium), The Crabby Taxonomists  
710 (Lafayette, USA), Diána Csonka (Budapest, Hungary), Soledad Lorena Diodato (Buenos  
711 Aires, Argentina), Casey W. Dunn (Providence, USA), Christine Ewers-Saucedo (Athens,  
712 USA), Paolo Galeotti (Pavia, Italy), Ian Gardiner (Calgary, Canada), Nelson Hairston (Ithaca,

713 USA), Matthew D. Hall (Melbourne, Australia), Andrew Hoffman (USA), J. Matthew Horch  
714 (formerly Stony Brook, USA), Colleen Kearns (Ithaca, USA), Waltraud Klepal (Vienna,  
715 Austria), Lukáš Konečný (Písečná, Czech Republic), Maurice Loir (Orange, France), Peer  
716 Martin (Berlin, Germany), Renate Matzke-Karasz (Munich, Germany), Oliver Menedoht  
717 (Recklinghausen, Germany), William A. Nelson (Kingston, USA), Christopher J. Neufeld  
718 (Squamish, Canada), North Carolina Wildlife Resources Commission (Raleigh, USA),  
719 Novaquatis (Dübendorf, Switzerland), Pia Østergaard (London, United Kingdom), Luis  
720 Miguel Pardo (Valdivia, Chile), Michael J. Raupach (Wilhelmshaven, Germany), Joe  
721 Reynolds (USA), Bernard Sainte-Marie (Mont-Joli, Canada), Thomas H. Shafer (formerly  
722 Wilmington, USA), David J. Siveter (Leicester, United Kingdom), Anita Slotwinski  
723 (Brisbane, Australia), Robin J. Smith (Kusatu, Japan), Prudence Talbot (Riverside, USA),  
724 Alain Thiéry (Marseille, France), Jean Vannier (Villeurbanne, France), Bat Won (USA),  
725 Yoichi Yusa (Nara, Japan).

726

## 727 **XV. REFERENCES**

728

- 729 ADKISON, D. L. & HEARD, R. W. (1995). *Pseudione overstreetii*, new species (Isopoda:  
730 Epicaridea: Bopyridae), a parasite of *Callichirus islagrande* (Decapoda: Anomura:  
731 Callianassidae) from the Gulf of Mexico. *Gulf Research Reports* **9**, 105–111.
- 732 ALMERÃO, M., BOND-BUCKUP, G. & MENDONÇA, M. S. JR. (2010). Mating behavior of *Aegla*  
733 *platensis* (Crustacea, Anomura, Aeglidae) under laboratory conditions. *Journal of*  
734 *Ethology* **28**, 87–94.
- 735 ANDREWS, E. A. (1904). Breeding habits of crayfish. *American Naturalist* **38**, 165–206.
- 736 ANDREWS, E. A. (1906). Egg-laying of crayfish. *American Naturalist* **40**, 343–356.
- 737 ANDREWS, E. A. (1907). The young of the crayfishes *Astacus* and *Cambarus*. *Smithsonian*  
738 *Contributions to Knowledge* **35**, 1–79.

- 739 ANGER, K. (2001). *The Biology of Decapod Crustacean Larvae*. Crustacean Issues 14.
- 740 Balkema, Lisse.
- 741 AVISE, J. C., TATARENKOV, A. & LIU, J.-X. (2011). Multiple mating and clutch size in
- 742 invertebrate brooders versus pregnant vertebrates. *Proceedings of the National Academy*
- 743 *of Sciences of the United States of America* **108**, 11512–11517.
- 744 BARNES, M. (1992). The reproductive periods and condition of the penis in several species of
- 745 common cirripedes. *Oceanography and Marine Biology Annual Reviews* **30**, 483–525.
- 746 BECKER, C., BRANDIS, D. & STORCH, V. (2011). Morphology of the female reproductive
- 747 system of European pea crabs (Crustacea, Decapoda, Brachyura, Pinnotheridae). *Journal*
- 748 *of Morphology* **272**, 12–26.
- 749 BECKER, C., TÜRKAY, M. & BRANDIS, D. (2012). The male copulatory system of European pea
- 750 crabs (Crustacea, Brachyura, Pinnotheridae). *Journal of Morphology* **273**, 1306–1318.
- 751 BENINGER, P. G., ELNER, R. W. & POUSSART, Y. (1991). Gonopods of the majid crab
- 752 *Chionoecetes opilio* (O. Fabricius). *Journal of Crustacean Biology* **11**, 217–228.
- 753 BIRKHEAD, T. R. & PIZZARI, T. (2002). Postcopulatory sexual selection. *Nature Reviews*
- 754 *Genetics* **3**, 262–273.
- 755 BOMFLEUR, B., MÖRS, T., FERRAGUTI, M., REGUERO, M. A. & MCLOUGHLIN, S. (2015).
- 756 Fossilized spermatozoa preserved in a 50-Myr-old annelid cocoon from Antarctica.
- 757 *Biology Letters* **11**, 20150431.
- 758 BOUCHON, D., RIGAUD, T. & JUCHAULT, P. (1998). Evidence for widespread *Wolbachia*
- 759 infection in isopod crustaceans: molecular identification and host feminization.
- 760 *Proceedings of the Royal Society B* **265**, 1081–1090.
- 761 BRANDIS, D., STORCH, V. & TÜRKAY, M. (1999). Morphology and function of the copulatory
- 762 system in freshwater crabs of the Genus *Potamon*. *Journal of Morphology* **239**, 157–166.

- 763 BRANDT, A. & JANSSEN, H. H. (1994). Redescription of *Zonophryxus quinquedens* Barnard,  
764 1913 (Crustacea, Isopoda, Dajidae) from the Weddell Sea, Antarctica, with notes on its  
765 biology and zoogeography. *Polar Biology* **14**, 343–350.
- 766 BREDE, N., SANDROCK, C., STRAILE, D., SPAAK, P., JANKOWSKI, T., STREIT, B. & SCHWENK, K.  
767 (2008). The impact of human-made ecological changes on the genetic architecture of  
768 *Daphnia* species. *Proceedings of the National Academy of Sciences of the United States*  
769 *of America* **106**, 4758–4763.
- 770 BROWN, G. G. (1966). Ultrastructural studies of sperm morphology and sperm-egg interaction  
771 in the decapod *Callinectes sapidus*. *Journal of Ultrastructure Research* **14**, 425–440.
- 772 CÁCERES, C. E. (1998). Interspecific variation in the abundance, production, and emergence of  
773 *Daphnia* diapausing eggs. *Ecology* **79**, 1699–1710.
- 774 CHASE, R. & BLANCHARD, K. C. (2006). The snail’s love-dart delivers mucus to increase  
775 paternity. *Proceedings of the Royal Society B* **273**, 1471–1475.
- 776 CHOW, S., OGASAWARA, Y. & TAKI, Y. (1982). Male reproductive system and fertilization of  
777 the palaemonid shrimp *Macrobrachium rosenbergii*. *Bulletin of the Japanese Society of*  
778 *Scientific Fisheries* **48**, 177–183.
- 779 CLUTTON-BROCK, T. H. (1991). *The Evolution of Parental Care*. Princeton University Press,  
780 Princeton.
- 781 COHEN, P. A., KNOLL, A. H. & KODNER, R. B. (2009). Large spinose microfossils in Ediacaran  
782 rocks as resting stages of early animals. *Proceedings of the National Academy of Sciences*  
783 *of the United States of America* **116**, 6519–6524.
- 784 CORDAUX, R., MICHEL-SALZAT, A., FRELON-RAIMOND, M., RIGAUD, T. & BOUCHON, D.  
785 (2004). Evidence for a new feminizing *Wolbachia* strain in the isopod *Armadillidium*  
786 *vulgare*: evolutionary implications. *Heredity* **93**, 78–84.
- 787 CORDAUX, R., PICHON, S., BEN AFIA HATIRA, H., DOUBLET, V., GRÈVE, P., MARCADÉ, I.,  
788 BRAQUART-VARNIER, C., SOUTY-GROSSET, C., CHARFI-CHEIKHROUHA, F. & BOUCHON, D.

- 789 (2012). Widespread *Wolbachia* infection in terrestrial isopods and other crustaceans.  
790 *ZooKeys* **176**, 123–131.
- 791 CRESSLER, C. E., NELSON, W. A., DAY, T. & MCCAULEY, E. (2014). Starvation reveals the  
792 cause of infection-induced castration and gigantism. *Proceedings of the Royal Society B*  
793 **281**, 20141087.
- 794 CSONKA, D., HALASY, K. & HORNING, E. (2015). Histological studies on the marsupium of  
795 two terrestrial isopods (Crustacea, Isopoda, Oniscidea). *ZooKeys* **515**, 81–92.
- 796 DAWSON, T. J. (1995). *Kangaroos: Biology of the Largest Marsupials*. Cornell University  
797 Press, Ithaca.
- 798 DECKER, R. W. R. J. & BROM, T. G. (1992). Megapode phylogeny and the interpretation of  
799 incubation strategies. *Zoologische Verhandelingen* **278**, 19–31.
- 800 DENNENMOSER, S. & THIEL, M. (2015). Cryptic female choice in crustaceans. In *Cryptic*  
801 *Female Choice in Arthropods* (eds A. V. Peretti and A. Aisenberg), pp. 203–237.  
802 Springer, Heidelberg.
- 803 DIESEL, R. (1990). Sperm competition and reproductive success in the decapod *Inachus*  
804 *phalangium* (Majidae): a male ghost spider crab that seals off rivals' sperm. *Journal of*  
805 *Zoology* **220**, 213–223.
- 806 DIODATO, S. L., BERASATEGUI, A. A. & HOFFMEYER, M. S. (2006). Morphological types and  
807 seasonal variation in eggs of zooplankton species from bottom sediments in Bahía Blanca  
808 Estuary, Argentina. *Brazilian Journal of Oceanography* **54**, 161–167.
- 809 EBERT, D., RAINLEY, P., EMBLEY, T. M. & SCHOLZ, D. (1996). Development, life cycle,  
810 ultrastructure and phylogenetic position of *Pasteuria ramosa* Metchnikoff 1888:  
811 rediscovery of an obligate endoparasite of *Daphnia magna* Straus. *Philosophical*  
812 *Transactions of the Royal Society B* **351**, 1689–1701.



- 813 EBERT, D., CARIUS, H.-J., LITTLE, T. & DECAESTECKER, E. (2004). The evolution of virulence  
814 when parasites cause host castration and gigantism. *American Naturalist* **164** Supplement,  
815 S19–32.
- 816 EWERS-SAUCEDO, C., HAYER, S. & BRANDIS, D. (2015). Functional morphology of the  
817 copulatory system of box crabs with long second gonopods (Calappidae, Eubrachyura,  
818 Decapoda, Crustacea). *Journal of Morphology* **276**, 77–89.
- 819 FACTOR, J. R. (1995). *Biology of the Lobster Homarus americanus*. Academic Press, San  
820 Diego.
- 821 FRYER, G. (1996). Diapause, a potent force in the evolution of freshwater crustaceans.  
822 *Hydrobiologia* **320**, 1–14.
- 823 GALEOTTI, P., PUPIN, F., RUBOLINI, D., SACCHI, R., NARDI, P. A. & FASOLA, M. (2007). Effects  
824 of female mating status on copulation behaviour and sperm expenditure in the freshwater  
825 crayfish *Austropotamobius italicus*. *Behavioral Ecology and Sociobiology* **61**, 711–718.
- 826 GALEOTTI, P., BERNINI, G., LOCATELLO, L., SACCHI, R., FASOLA, M. & RUBOLINI, D. (2012).  
827 Sperm traits negatively covary with size and asymmetry of a secondary sexual trait in a  
828 freshwater crayfish. *PLoS ONE* **7**, e43771.
- 829 GHERARDI, F. (2002). Behaviour. In *Biology of Freshwater Crayfish* (ed. D. M. Holdich), pp.  
830 258–290. Blackwell, Oxford.
- 831 GÓMEZ-GUTIÉRREZ, J. (2003). Hatching mechanism and accelerated hatching of the eggs of a  
832 sac-spawning euphausiid *Nematoscelis difficilis*. *Journal of Plankton Research* **25**, 1397–  
833 1411.
- 834 GOUDEAU, M. (1982). Fertilization in a crab: I. Early events in the ovary, and cytological  
835 aspects of the acrosome reaction and gamete contacts. *Tissue and Cell* **14**, 97–111.
- 836 GOUDEAU, M., TALBOT, P. & HARPER, R. (1987). Mechanism of egg attachment stalk  
837 formation in the lobster, *Homarus*. *Gamete Research* **18**, 279–289.

- 838 GRAHAM, D. J., PERRY, H., BIESIO, P. & FULFORD, R. (2012). Fecundity and egg diameter of  
839 primiparous and multiparous blue crab *Callinectes sapidus* (Brachyura: Portunidae) in  
840 Mississippi waters. *Journal of Crustacean Biology* **32**, 49–56.
- 841 GRUNER, H.-E. (1993). Crustacea. In *Arthropoda (ohne Insecta). Lehrbuch der Speziellen*  
842 *Zoologie, Band I, 4. Teil* (ed. H.-E. Gruner), pp. 448–1030. Gustav Fischer Verlag, Jena.
- 843 HAIRSTON, N. G. JR. (1996). Zooplankton egg banks as biotic reservoirs in changing  
844 environments. *Limnology and Oceanography* **41**, 1087–1092.
- 845 HAIRSTON, N. G. JR., VAN BRUNT, R. A., KEARNS, C. M. & ENGSTROM, D. R. (1995). Age and  
846 survivorship of diapausing eggs in a sediment egg bank. *Ecology* **76**, 1706–1711.
- 847 HAIRSTON, N. G. JR., LAMPERT, W., CÁCERES, C. E., HOLTMEIER, C. L., WEIDER, L. J.,  
848 GAEDKE, U., FISCHER, J. M., FOX, J. A. & POST, D. M. (1999). Rapid evolution revealed  
849 by dormant eggs. *Nature* **401**, 446.
- 850 HAMR, P. (1992). Embryonic and postembryonic development in the Tasmanian freshwater  
851 crayfishes *Astacopsis gouldi*, *Astacopsis franklinii* and *Parastacoides tasmanicus*  
852 *tasmanicus* (Decapoda: Parastacidae). *Australian Journal of Marine and Freshwater*  
853 *Research* **43**, 861–878.
- 854 HARVEY, T. H. P., VÉLEZ, M. I., BUTTERFIELD, N. J. (2012). Exceptionally preserved  
855 crustaceans from western Canada reveal a cryptic Cambrian radiation. *Proceedings of the*  
856 *National Academy of Sciences of the United States of America* **109**, 1589–1594.
- 857 HINES, A. H. (1991). Fecundity and reproductive output in nine species of *Cancer* crabs  
858 (Crustacea, Brachyura, Cancridae). *Canadian Journal of Fisheries and Aquatic Sciences*  
859 **48**, 267–275.
- 860 HOBBS, H. H. JR. (1989). An illustrated checklist of the American crayfishes (Decapoda:  
861 Astacidae, Cambaridae, and Parastacidae). *Smithsonian Contributions to Zoology* **480**, 1–  
862 236.

- 863 HOEG, J. T. (1991). Functional and evolutionary aspects of the sexual system in the  
864 Rhizocephala (Thecostraca: Cirripedia). In *Crustacean Sexual Biology* (eds R. T. Bauer  
865 and J. M. Martin), pp. 208–227. Columbia University Press, New York.
- 866 HOESE, B. & JANSSEN, H. H. (1989). Morphological and physiological studies on the  
867 marsupium in terrestrial isopods. *Monitore Zoologico Italiano, Nuova Serie, Monografia*  
868 **4**, 153–173.
- 869 HOLDICH, D. M. (2002). Background and functional morphology. In *Biology of Freshwater*  
870 *Crayfish* (ed. D. M. Holdich), pp. 3–29. Blackwell, Oxford.
- 871 HORCH, J. M. (2009). Adaptive plasticity of the penis in a simultaneous hermaphrodite.  
872 *Evolution* **63**, 1946–1953.
- 873 JAMIESON, B. G. M. (1991). Ultrastructure and phylogeny of crustacean spermatozoa.  
874 *Memoirs of the Queensland Museum* **31**, 109–142.
- 875 JEFFERY, N. W. (2015). *Genome Size Diversity and Evolution in the Crustacea*. PhD-Thesis.  
876 Faculty of Graduate Studies, University of Guelph, Guelph, Canada.
- 877 JENSEN, P. C. & BENTZEN, P. (2012). A molecular dissection of the mating system of the  
878 Dungeness Crab, *Metacarcinus magister* (Brachyura: Cancridae). *Journal of Crustacean*  
879 *Biology* **32**, 443–456.
- 880 JIANG, X., ZHAO, S., XU, Z., WANG, G., HE, J. & CAI, M. (2012). Abundance and age of viable  
881 resting eggs of the calanoid copepod *Boeckella poppei* Mrázek in sediments: evidence of  
882 egg banks in two Antarctic maritime lakes. *Polar Biology* **35**, 1525–1531.
- 883 JUCHAULT, P., RIGAUD, T. & MOCQUARD, J. P. (1992). Evolution of sex-determining  
884 mechanisms in a wild population of *Armadillidium vulgare* Latr. (Crustacea, Isopoda):  
885 competition between two feminizing parasitic factors. *Heredity* **69**, 382–390.
- 886 KAHRL, A. F., LAUSHMAN, R. H. & ROLES, A. J. (2014). Evidence for multiple paternity in two  
887 species of *Orconectes* crayfish. *Canadian Journal of Zoology* **92**, 985–988.

- 888 KARANOVIC, I. (2012). *Recent Freshwater Ostracods of the World: Crustacea, Ostracoda,*  
889 *Podocopida*. Springer, Heidelberg.
- 890 KIØRBOE, T. & SABATINI, M. (1994). Reproductive and life-cycle strategies in egg-carrying  
891 and free-spawning calanoid copepods. *Journal of Plankton Research* **16**, 1353–1366.
- 892 KLEPAL, W., BARNES, H. & MUNN, E. A. (1972). The morphology and histology of the  
893 cirriped penis. *Journal of Experimental Marine Biology and Ecology* **10**, 243–265.
- 894 KLEPAL, W., RENTENBERGER, C., ZHEDEN, V., ADAM, S. & GRUBER, D. (2010). Structural  
895 peculiarities of the penis of *Semibalanus balanoides* (Linnaeus, 1767) and *Chthamalus*  
896 *stellatus* (Poli, 1791) (Crustacea: Cirripedia: Thoracica). *Journal of Experimental Marine*  
897 *Biology and Ecology* **392**, 228–233.
- 898 LAWRENCE, S. E. (1992). Sexual cannibalism in the praying mantis, *Mantis religiosa*: a field  
899 study. *Animal Behaviour* **43**, 569–583.
- 900 LÉCHER, P., DEFAYE, D. & NOEL, P. (1995). Chromosomes and nuclear DNA of Crustacea.  
901 *Invertebrate Reproduction and Development* **27**, 85–114.
- 902 LEE, W. Y., OMORI, M. & PECK, R. W. (1992). Growth, reproduction and feeding behavior of  
903 the planktonic shrimp, *Lucifer faxoni* Borradaile, off the Texas coast. *Journal of Plankton*  
904 *Research* **14**, 61–69.
- 905 LÓPEZ-CAMPS, J., BARGALLÓ, R., BOZZO, M. G., DURFORT, M. & FONTARNAU, R. (1981). The  
906 spermatogenesis of crustaceans. VII. Review of spermatozoon of the crayfish *Astacus*  
907 *astacus* (Malacostraca, Decapoda, Macrura, Reptantia). *Gamete Research* **4**, 65–82.
- 908 MACRAE, T. H. (2010). Gene expression, metabolic regulation and stress tolerance during  
909 diapause. *Cellular and Molecular Life Sciences* **67**, 2405–2424.
- 910 MARTIN, J. W. & DAVIS, G. E. (2001). *An Updated Classification of the Recent Crustacea*.  
911 Science Series 39. Natural History Museum of Los Angeles County, Los Angeles.

- 912 MARTIN, P., THONAGEL, S. & SCHOLTZ, G. (2015). The parthenogenetic Marmorkrebs  
913 (Malacostraca: Decapoda: Cambaridae) is a triploid organism. *Journal of Zoological*  
914 *Systematics and Evolutionary Research*, in press.
- 915 MASON, J. C. (1970). Egg-laying in the Western North American crayfish, *Pacifastacus*  
916 *trowbridgii* (Stimpson) (Decapoda, Astacidae). *Crustaceana* **19**, 37–44.
- 917 MATZKE-KARASZ, R. (2005). Giant spermatozoon coiled in small egg: fertilization  
918 mechanisms and their implications for evolutionary studies on Ostracoda (Crustacea).  
919 *Journal of Experimental Zoology (Molecular Development and Evolution)* **304B**, 129–  
920 149.
- 921 MATZKE-KARASZ, R., SMITH, R. J., SYMONOVÁ, R., MILLER, G. & TAFFOREAU, P. (2009).  
922 Sexual intercourse involving giant sperm in Cretaceous ostracode. *Science* **324**, 1535.
- 923 MATZKE-KARASZ, R., NEIL, J. V., SMITH, R. J., SYMONOVA, R., MOŘKOVSKY, L., ARCHER, M.,  
924 HAND, S. J., CLOETENS, P. & TAFFOREAU, P. (2014). Subcellular preservation in giant  
925 ostracod sperm from an early Miocene cave deposit in Australia. *Proceedings of the*  
926 *Royal Society B* **281**, 20140394.
- 927 MCGREGOR, D. L. & KESLING, R. V. (1969). Copulatory adaptations in ostracods. Part II.  
928 Adaptations in living ostracods. *Contributions from the Museum of Paleontology of the*  
929 *University of Michigan* **22**, 221–239.
- 930 MCLAY, C. L. & LÓPEZ GRECO, L. S. (2011). A hypothesis about the origin of sperm storage  
931 in the Eubrachyura, the effects of seminal receptacle structure on mating strategies and  
932 the evolution of crab diversity: How did a race to be first become a race to be last?  
933 *Zoologischer Anzeiger* **250**, 378–406.
- 934 MERGEAY, J., VERSCHUREN, D. & DE MEESTER, L. (2006). Invasion of an asexual American  
935 water flea clone throughout Africa and rapid displacement of a native sibling species.  
936 *Proceedings of the Royal Society B* **273**, 2839–2844.

- 937 MITTMANN, B., UNGERER, P., KLANN, M., STOLLEWERK, A. & WOLFF, C. (2014).  
938 Development and staging of the water flea *Daphnia magna* (Straus, 1820; Cladocera,  
939 Daphniidae) based on morphological landmarks. *EvoDevo* **5**, 12.
- 940 NEUFELD, C. J. & PALMER, A. R. (2008). Precisely proportioned: intertidal barnacles alter  
941 penis form to suit coastal wave action. *Proceedings of the Royal Society B* **275**, 1081–  
942 1087.
- 943 NG, P. K. L. & TAN, C. G. S. (1995). *Geosesarma notophorum* sp. nov. (Decapoda, Brachyura,  
944 Grapsidae, Sesarminae), a terrestrial crab from Sumatra, with novel brooding behaviour.  
945 *Crustaceana* **68**, 390–395.
- 946 NIYAMA, H. (1962). On the unprecedentedly large number of chromosomes of the crayfish,  
947 *Astacus trowbridgii* Stimpson. *Annotationes Zoologicae Japonenses* **35**, 229–233.
- 948 NIKSIRAT, H., KOUBA, A. & KOZÁK, P. (2014). Post-mating morphological changes in the  
949 spermatozoon and spermatophore wall of the crayfish *Astacus leptodactylus*: insight into  
950 a non-motile spermatozoon. *Animal Reproduction Science* **149**, 325–334.
- 951 OHTSUKI, H., AWANO, T., TSUGEKI, N. K., ISHIDA, S., ODA, H., MAKINO, W. & URABE, J.  
952 (2015). Historical changes in the ecosystem condition of a small mountain lake over the  
953 past 60 years as revealed by plankton remains and *Daphnia* ephippial carapaces stored in  
954 lake sediments. *PLoS ONE* **10**, e0119767.
- 955 OLESEN, J., BOESGAARD, T. & ILIFFE, T. M. (2015). The unique dorsal brood pouch of  
956 *Thermosbaenacea* (Crustacea, Malacostraca) and description of an advanced  
957 developmental stage of *Tulumella unidens* from the Yucatan Peninsula (Mexico), with a  
958 discussion of mouth part homologies to other Malacostraca. *PLoS ONE* **10**, e0122463.
- 959 ØSTERGAARD, P. (2004). Does male *Chondracanthus lophii* (Crustacea: Copepoda) feed?  
960 *Journal of the Marine Biological Association of the United Kingdom* **84**, 711–716.

- 961 ØSTERGAARD, P. & BOXSHALL, G. A. (2004). Giant females and dwarf males: a comparative  
962 study of nuptial organs in female Chondracanthidae (Crustacea: Copepoda). *Zoologischer*  
963 *Anzeiger* **243**, 65–74.
- 964 OTTO, S. P. & WHITTON, J. (2000). Polyploid incidence and evolution. *Annual Review of*  
965 *Genetics* **34**, 401–437.
- 966 PARDO, L. M., RIVEROS, M., FUENTES, J. P. & LÓPEZ-GREO, L. (2013). Functional morphology  
967 of the seminal receptacle in the crab *Metacarcinus edwardsii*. *Invertebrate Biology* **132**,  
968 386–393.
- 969 PAUL, A. J. (1984). Mating frequency and viability of stored sperm in the Tanner crab  
970 *Chionoecetes bairdi* (Decapoda, Majidae). *Journal of Crustacean Biology* **4**, 375–381.
- 971 PITNICK, S., SPICER, G. S. & MARKOW, T. A. (1995). How long is a giant sperm? *Nature* **375**,  
972 109.
- 973 POINAR, G. (2000). First fossil record of stalked spermatophores with sperm (Collembola:  
974 Hexapoda). *Historical Biology* **14**, 229–234.
- 975 PORTER, M. L., PÉREZ-LOSADA, M. & CRANDALL, K. A. (2005). Model-based multilocus  
976 estimation of decapod phylogeny and divergence times. *Molecular Phylogenetics and*  
977 *Evolution* **37**, 355–369.
- 978 PRAGER, M. H., MCCONAUGHA, J. R., JONES, C. M. & GEER, P. J. (1990). Fecundity of blue  
979 crab, *Callinectes sapidus*, in Chesapeake Bay: biological, statistical and management  
980 considerations. *Bulletin of Marine Science* **46**, 170–179.
- 981 PRICE, J. S., ALLEN, S., FAUCHEUX, C., ALTHNAIAN, T. & MOUNT, J. G. (2005). Deer antlers: a  
982 zoological curiosity or the key to understanding organ regeneration in mammals? *Journal*  
983 *of Anatomy* **207**, 603–618.
- 984 RADZIKOWSKI, J. (2013). Resistance of dormant stages of planktonic invertebrates to adverse  
985 environmental conditions. *Journal of Plankton Research* **35**, 707–723.

- 986 RAUPACH, M. J. & THATJE, S. (2006). New records of the rare shrimp parasite *Zonophryxus*  
987 *quinquedens* Barnard, 1913 (Crustacea, Isopoda, Dajidae): ecological and phylogenetic  
988 implications. *Polar Biology* **29**, 439–443.
- 989 RICHTER, S. & SCHOLTZ, G. (2001). Phylogenetic analysis of the Malacostraca (Crustacea).  
990 *Journal of Zoological Systematics and Evolutionary Research* **39**, 113–116.
- 991 RIGAUD, T., JUCHAULT, P. & MOCQUARD, J. P. (1997). The evolution of sex determination in  
992 isopod crustaceans. *BioEssays* **19**, 409–416.
- 993 RIGAUD, T., PENNINGS, P. & JUCHAULT, P. (2001). *Wolbachia* bacteria effects after  
994 experimental interspecific transfers in terrestrial isopods. *Journal of Invertebrate Pathology*  
995 **77**, 251–257.
- 996 RODRIGUEZ-LAZARO, J. & RUIZ-MUÑOZ, F. (2012). A general introduction to ostracods:  
997 morphology, distribution, fossil record and applications. In *Ostracoda as Proxies for*  
998 *Quaternary Climate Change* (eds. D. J. HORNE, J. A. HOLMES, J. RODRIGUEZ-LAZARO and  
999 F. A. VIEHBERG). *Developments in Quaternary Science* 17, pp. 1–14. Elsevier, Amsterdam.
- 1000 ROJAS-HERNANDEZ, N., VÉLIZ, D. & PARDO, L. M. (2014). Use of novel microsatellite  
1001 markers for population and paternity analysis in the commercially important crab  
1002 *Metacarcinus edwardsii* (Brachyura: Cancridae). *Marine Biology Research* **10**, 839–844.
- 1003 RUDOLPH, E. H. & ROJAS, C. S. (2003). Embryonic and early postembryonic development of  
1004 the burrowing crayfish, *Virilastacus araucanius* (Faxon, 1914) (Decapoda, Parastacidae)  
1005 under laboratory conditions. *Crustaceana* **76**, 835–850.
- 1006 SAINTE-MARIE, G., SAINTE-MARIE, B. & SÉVIGNY, J.-M. (2000). Ejaculate-storage patterns  
1007 and the site of fertilization in female snow crabs (*Chionoecetes opilio*; Brachyura,  
1008 Majidae). *Canadian Journal of Zoology* **78**, 1902–1917.
- 1009 SAINTE-MARIE, B., GOSSELIN, T., SÉVIGNY, J. M. & URBANI, N. (2008). The snow crab mating  
1010 system: opportunity for natural and unnatural selection in a changing environment. *Bulletin*  
1011 *of Marine Science* **83**, 131–161.



- 1012 SCHMINKE, H. K. (2007). Crustacea, Krebse. In *Spezielle Zoologie. Teil 1: Einzeller und*  
1013 *Wirbellose Tiere*, 2. Auflage (Hrsg. W. WESTHEIDE and R. RIEGER), pp. 555–637.  
1014 Spektrum Akademischer Verlag, Heidelberg.
- 1015 SCHOLTZ, G. (1995). The attachment of the young in the New Zealand freshwater crayfish  
1016 *Paranephrops zealandicus* (White, 1847) (Decapoda, Astacida, Parastacidae). *New*  
1017 *Zealand Natural Sciences* **22**, 81–89.
- 1018 SCHOLTZ, G. & KAWAI, T. (2002). Aspects of embryonic and postembryonic development of  
1019 the Japanese freshwater crayfish *Cambaroides japonicus* (Crustacea, Decapoda) including  
1020 a hypothesis on the evolution of maternal care in the Astacida. *Acta Zoologica* **83**, 203–  
1021 212.
- 1022 SEPKOSKI, J. J. JR. (2000). Crustacean biodiversity through the marine fossil record.  
1023 *Contributions to Zoology* **69**, 213–222.
- 1024 SHU, D., VANNIER, J., LUO, H., CHEN, L., ZHANG, X. & HU, S. (1999). Anatomy and lifestyle  
1025 of *Kunmingella* (Arthropoda, Bradoriida) from the Chengjiang fossil Lagerstätte (lower  
1026 Cambrian; Southwest China). *Lethaia* **32**, 279–298.
- 1027 SIVETER, D. J., SUTTON, M. D., BRIGGS, D. E. G. & SIVETER, D. J. (2003). An ostracode  
1028 crustacean with soft parts from the Lower Silurian. *Science* **302**, 1749–1751.
- 1029 SIVETER, D. J., SIVETER, D. J., SUTTON, M. D. & BRIGGS, D. E. G. (2007). Brood care in a  
1030 Silurian ostracod. *Proceedings of the Royal Society B* **274**, 465–469.
- 1031 SIVETER, D. J., TANAKA, G., FARRELL, Ú. C., MARTIN, M. J., SIVETER, D. J. & BRIGGS, D. E. G.  
1032 (2014). Exceptionally preserved 450-million-year-old Ordovician ostracods with brood  
1033 care. *Current Biology* **24**, 801–806.
- 1034 SMITH, R. J., MATZKE-KARASZ, R., KAMIYA, T. & DE DECKKER, P. (2015). Sperm lengths of  
1035 non-marine cypridoidean ostracods (Crustacea). *Acta Zoologica*, in press.

- 1036 SRINIVASAGAM, S., KATHIRVEL, M. & KULASEKARAPANDIAN, S. (2000). Captive broodstock  
1037 development, induced breeding and larval stages of mud crabs (*Scylla* spp.) *CIBA*  
1038 *Bulletin* **12**, 1–26.
- 1039 TALBOT, P. & CHANMANON, P. (1980a). The structure of sperm from the lobster, *Homarus*  
1040 *americanus*. *Journal of Ultrastructure Research* **70**, 275–286.
- 1041 TALBOT, P. & CHANMANON, P. (1980b). Morphological features of the acrosome reaction of  
1042 lobster (*Homarus*) sperm and the role of the reaction in generating forward sperm  
1043 movement. *Journal of Ultrastructure Research* **70**, 287–297.
- 1044 TALBOT, P., POOLSANGUAN, B., AL-HAJJ, H. & POOLSANGUAN, W. (1991). Gamete  
1045 interactions during in vitro fertilization of lobster (*Homarus americanus*) oocytes.  
1046 *Journal of Structural Biology* **106**, 125–134.
- 1047 THIEL, M. (2000). Extended parental care behavior in crustaceans - a comparative overview.  
1048 In *The Biodiversity Crisis and Crustacea*, Crustacean Issues 12 (eds J. C. VON VAUPEL  
1049 KLEIN and F. R. SCHRAM), pp. 211–226. Balkema, Rotterdam.
- 1050 THIEL, M. (2003). Extended parental care in crustaceans - an update. *Revista Chilena de*  
1051 *Historia Natural* **76**, 205–218.
- 1052 THIEL, M. (2007). Social behavior of parent-offspring groups in crustaceans. In *Evolutionary*  
1053 *Ecology of Social and Sexual Systems: Crustaceans as Model Organisms* (eds J. E.  
1054 DUFFY and M. THIEL), pp. 294–318. Oxford University Press, Oxford.
- 1055 THIERY, A. & GASC, C. (1991). Resting eggs of Anostraca, Notostraca and Spinicaudata  
1056 (Crustacea, Branchiopoda) occurring in France: identification and taxonomical value.  
1057 *Hydrobiologia* **212**, 245–259.
- 1058 THOMAS, W. J. & CRAWLEY, E. (1975). The glair glands and oosetae of *Austropotamobius*  
1059 *pallipes* (Lereboullet). *Experientia* **31**, 534–537.

- 1060 TSAI, I. & TALBOT, P. (1993). Video microscopic analysis of ionophore induced acrosome  
1061 reactions of lobster (*Homarus americanus*) sperm. *Molecular Reproduction and*  
1062 *Development* **36**, 454–461.
- 1063 TSUCHIYA, K. & HAYASHI, F. (2014). Left-handed sperm removal by male *Calopteryx*  
1064 damselflies (Odonata). *SpringerPlus* **3**, 144.
- 1065 TUDGE, C. & KOENEMANN, S. (2009). Spermatozoal morphology and its bearing on decapod  
1066 phylogeny. In *Decapod Crustacean Phylogenetics* (eds J. W. MARTIN, K. A. CRANDALL  
1067 and D. L. FELDER). Crustacean Issue 18, pp. 101–120. CRC Press, Baton Rouge.
- 1068 URBANI, N., SAINTE-MARIE, B., SÉVIGNY, J.-M., ZADWORNÝ, D. & KUHNLEIN, U. (1998).  
1069 Sperm competition and paternity assurance during the first breeding period of female  
1070 snow crab (*Chionoecetes opilio*) (Brachyura: Majidae). *Canadian Journal of Fisheries*  
1071 *and Aquatic Sciences* **55**, 1104–1113.
- 1072 VOGT, G. (2002). Functional anatomy. In *Biology of Freshwater Crayfish* (ed. D. M.  
1073 HOLDICH), pp. 53–151. Blackwell, Oxford.
- 1074 VOGT, G. (2008). Investigation of hatching and early post-embryonic life of freshwater  
1075 crayfish by in vitro culture, behavioral analysis, and light and electron microscopy.  
1076 *Journal of Morphology* **269**, 790–811.
- 1077 VOGT, G. (2013). Abbreviation of larval development and extension of brood care as key  
1078 features of the evolution of freshwater Decapoda. *Biological Reviews* **88**, 81–116.
- 1079 VOGT, G. & TOLLEY, L. (2004). Brood care in freshwater crayfish and relationship with the  
1080 offspring's sensory deficiencies. *Journal of Morphology* **262**, 566–582.
- 1081 VOGT, G., FALCKENHAYN, C., SCHRIMPF, A., SCHMID, K., HANNA, K., PANTELEIT, J., HELM,  
1082 M., SCHULZ, R. & LYKO, F. (2015). The marbled crayfish as a paradigm for saltational  
1083 speciation by autopolyploidy and parthenogenesis in animals. *Biology Open* **4**, 1583–  
1084 1594.
- 1085 VOLLRATH, F. (1998). Dwarf males. *Trends in Ecology and Evolution* **13**, 159–163.

- 1086 WAAGE, J. K. (1979). Dual function of the damselfly penis: sperm removal and transfer.  
1087 *Science* **203**, 916–918.
- 1088 WALKER, D., PORTER, B. A. & AVISE, J. C. (2002). Genetic parentage assessment in the  
1089 crayfish *Orconectes placidus*, a high-fecundity invertebrate with extended maternal brood  
1090 care. *Molecular Ecology* **11**, 2115–2122.
- 1091 WANG, B., XIA, F., WAPPLER, T., SIMON, E., ZHANG, H., JARZEMBOWSKI, E. A. & SZWEDO, J.  
1092 (2015). Brood care in a 100-million-year-old scale insect. *eLife* **4**, e05447.
- 1093 WIGBY, S. & CHAPMAN, T. (2004). Sperm competition. *Current Biology* **14**, R100–103.
- 1094 WILLIAMS, J. D. & BOYKO, C. B. (2012). The global diversity of parasitic isopods associated  
1095 with crustacean hosts (Isopoda: Bopyroidea and Cryptoniscoidea). *PLoS ONE* **7**,  
1096 e35350.2,3.
- 1097 YAMADA, S. & MATZKE-KARASZ, R. (2012). How is a giant sperm ejaculated? Anatomy and  
1098 function of the sperm pump, or “Zenker organ,” in *Pseudocandona marchica* (Crustacea,  
1099 Ostracoda, Candonidae). *Naturwissenschaften* **99**, 523–535.
- 1100 YUE, G. H. & CHANG, A. (2010). Molecular evidence for high frequency of multiple paternity  
1101 in a freshwater shrimp species *Caridina ensifera*. *PLoS ONE* **5**, e12721.
- 1102 YUE, G. H., LI, J. L., WANG, C. M., XIA, J. H., WANG, G. L. & FENG, J. B. (2010). High  
1103 prevalence of multiple paternity in the invasive crayfish species, *Procambarus clarkii*.  
1104 *International Journal of Biological Sciences* **6**, 107–115.
- 1105 YUSA, Y., YOSHIKAWA, M., KITaura, J., KAWANE, M., OZAKI, Y., YAMATO, S. & HØEG, J. T.  
1106 (2012). Adaptive evolution of sexual systems in pedunculate barnacles. *Proceedings of*  
1107 *the Royal Society B* **279**, 959–966.

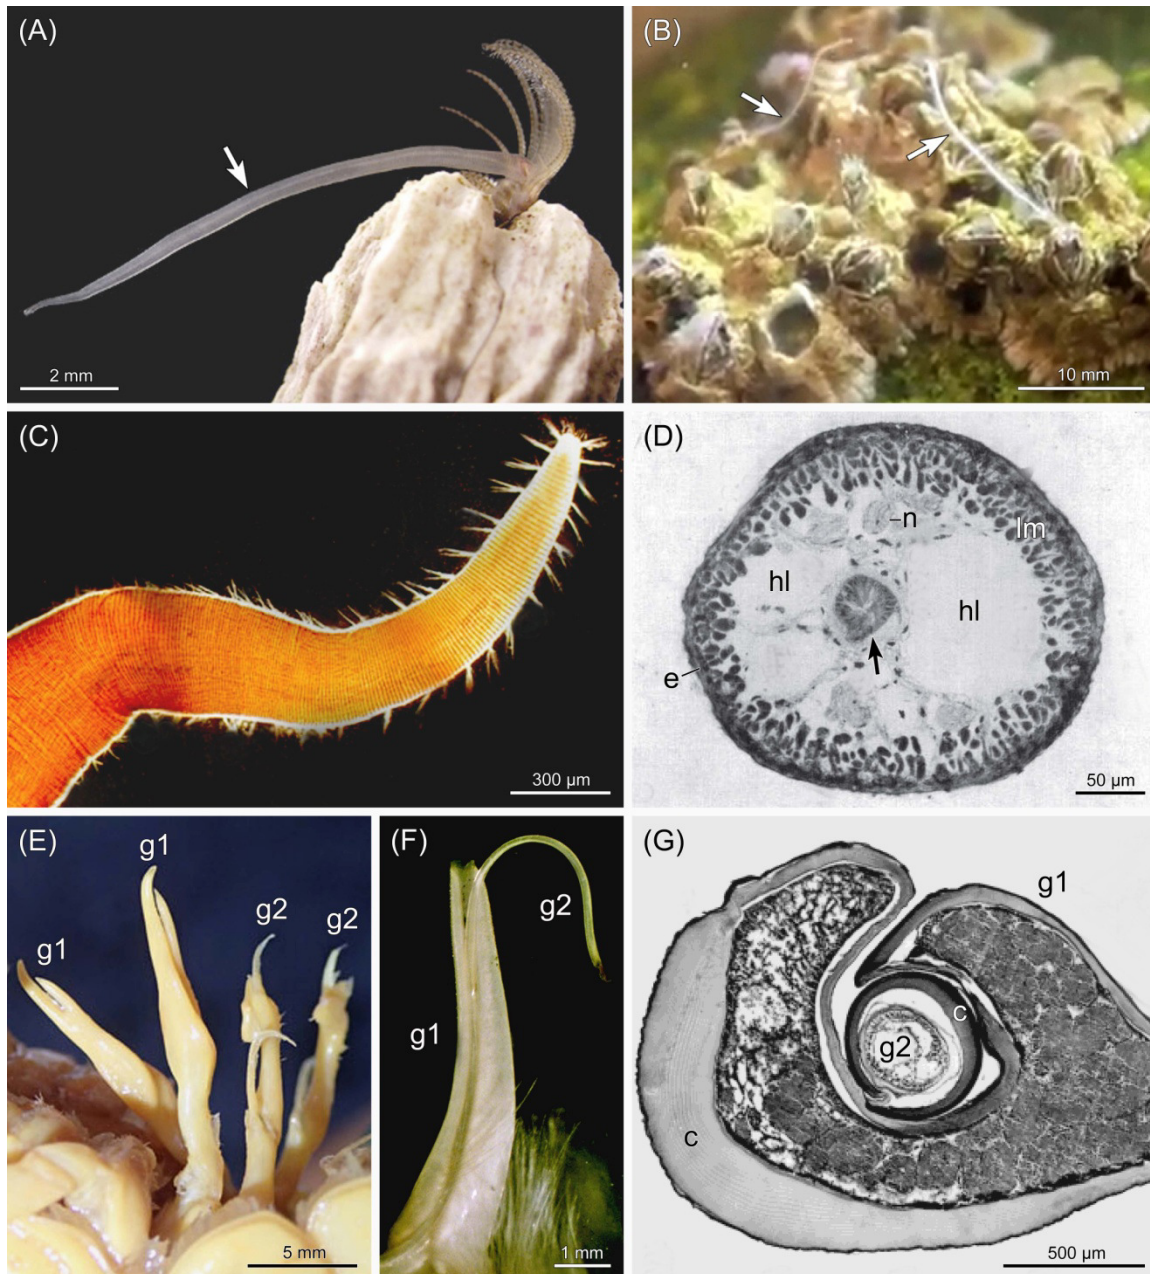

1108  
1109

1110 **Fig. 1.** Extensible versus form-invariant copulatory organs. (A-D) Hydraulic penis of  
1111 Cirripedia. (A) Relaxed penis (arrow) of *Balanus glandula*. Photo: Christopher J. Neufeld. (B)  
1112 Extended penises (arrows) of *Semibalanus balanoides*. From a video by Casey Dunn, filmed  
1113 by Stefan Siebert: <https://vimeo.com/7461478>. (C) Apical part of penis of *Semibalanus*  
1114 *balanoides* showing annulations and groups of setae. Photo: J. Matthew Horch. (D) Cross  
1115 section through penis of *Balanus balanus* showing inflatable haemolymph lacunae (hl).  
1116 Arrow, ductus ejaculatorius; e, epidermis with thin cuticle; lm, longitudinal musculature; n,  
1117 nerve. From Klepal *et al.* (1972). (E-G) Permanently stiff copulatory organs of Decapoda. (E)  
1118 Paired copulatory organs of crayfish *Orconectes cristavarius* consisting of first (g1) and  
1119 second gonopods (g2). Photo: North Carolina Wildlife Resources Commission. (F)  
1120 Copulatory organ of box crab *Calappaula saussurei* with second gonopod inserted in first  
1121 gonopod. From Ewers-Saucedo *et al.* (2015). (G) Cross section through functional state of  
1122 copulatory organ of freshwater crab *Potamon gedrosianum* showing thick stabilizing cuticles  
1123 (c) in both gonopods. From Brandis *et al.* (1999).

1124  
1125

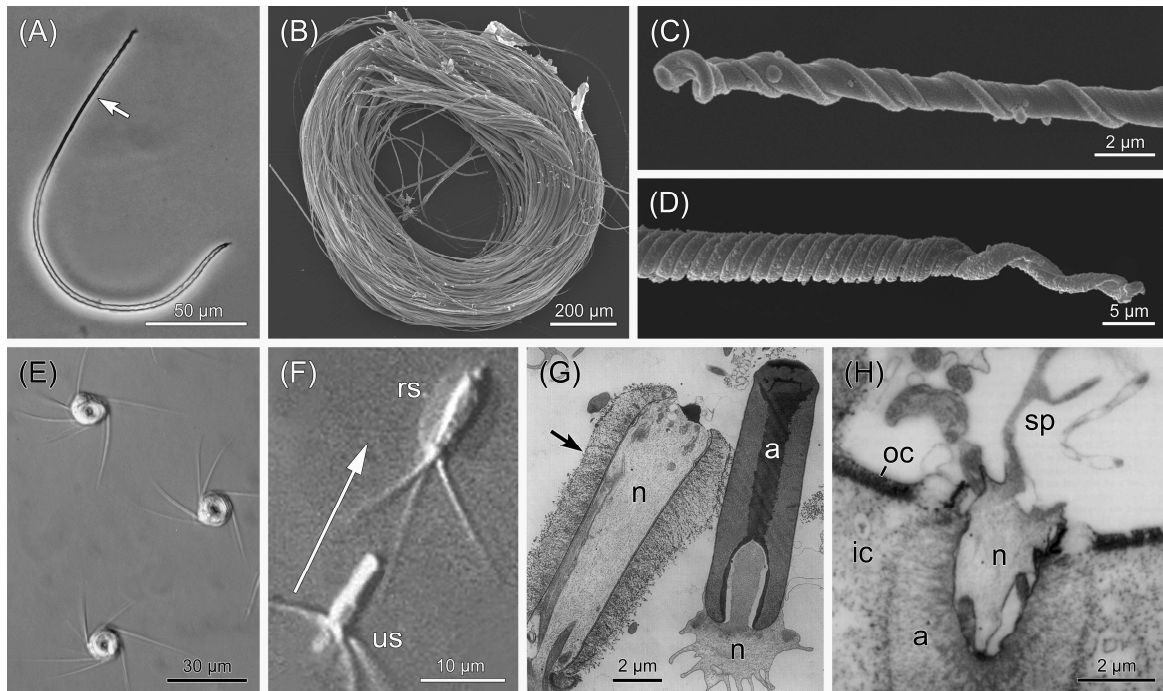

1126

1127 **Fig. 2.** Spermatozoa of exceptional form and function. (A-D) Giant sperm of cypridoidean  
1128 Ostracoda. From Smith *et al.* (2015). (A) Shortest giant sperm from *Fabaeformiscandona*  
1129 *velifera*. Arrow denotes anterior region. (B) Sperm bundle from seminal vesicle of  
1130 *Australocypris robusta*, the ostracod with the longest sperm. (C) Drilled anterior tip of sperm  
1131 of *Pseudocandona marchica*. (D) End piece of sperm of *Eucypris virens*. (E-H) Explosion  
1132 sperm of Decapoda. (E) Spermatozoa of crayfish *Austropotamobius italicicus* showing compact  
1133 body and extended radial arms. From Galeotti *et al.* (2012). (F-H) Spermatozoa of lobster  
1134 *Homarus americanus*. (F) Movement of sperm (arrow) by abrupt acrosome eversion. Montage  
1135 of two pictures from a video. rs, reacted sperm; us, unreacted sperm. From Tsai & Talbot  
1136 (1993). (G) Ultrastructural aspects of unreacted (right) and reacted (left) sperm. Note relative  
1137 position of the nucleus (n). Arrow denotes everted material of the reacted acrosome. a,  
1138 unreacted acrosome. From Talbot & Chanmanon (1980b). (H) Penetration of spermatozoon  
1139 through envelope of oocyte. The acrosome is in the process of eversion and the nucleus is  
1140 thereby torn into the envelope. ic, inner chorion layer; oc, outer chorion layer; sp, spike. From  
1141 Talbot *et al.* (1991).

1142

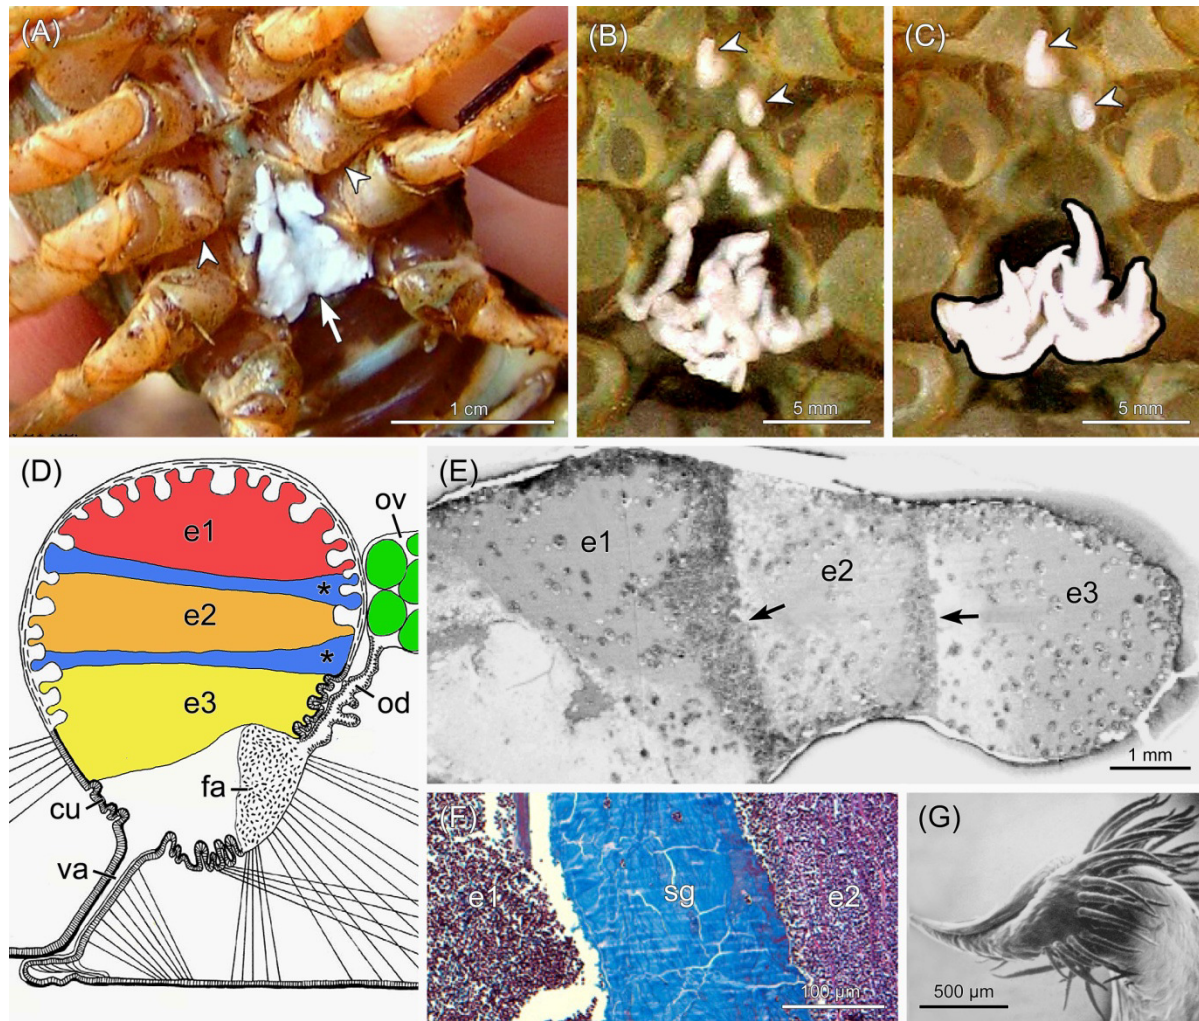

1143

1144 **Fig. 3.** Storage of sperm from multiple matings in Decapoda. (A-C) External attachment of  
1145 spermatophores in astacid crayfish. (A) Preferred sperm attachment site (arrow) between  
1146 female gonopores (arrowheads) in *Astacus astacus*. Photo: Lukáš Konečný. (B, C) Partial  
1147 removal of spermatophores of earlier mate (B) by following mate (C) in *Austropotamobius*  
1148 *italicus*. Arrowheads denote spermatophores remaining from earlier mate. Newly added  
1149 sperm is black-rimmed. From Galeotti *et al.* (2007). (D-F) Internal sperm storage in  
1150 eubrachyuran crabs. (D) Scheme of stratification of multiple ejaculates (e1-e3) in seminale  
1151 receptacle of female. Mixing of sperm is prevented by hardened sperm gel (asterisks) between  
1152 ejaculates. The last male deposits his sperm closest to the fertilization area (fa). cu, cuticle;  
1153 od, oviduct; ov, ovary; va, vagina. Modified after Becker *et al.* (2011). (E) Histological  
1154 section through seminal receptacle of *Chionoecetes opilio* showing sperm stratification.  
1155 Arrows denote layers of densely packed sperm. From Sainte-Marie *et al.* (2000). (F) Older  
1156 (e1) and fresh (e2) sperm packages separated by sperm gel (sg) in sperm receptacle of  
1157 *Metacarcinus edwardsii*. From Pardo *et al.* (2013). (G) Tip of first gonopod of *Chionoecetes*  
1158 *opilio* with recurved spoon-like structure and setal brushes suspected to serve for the removal  
1159 of rivals' sperm from the seminal receptacle. From Beninger *et al.* (1991).

1160

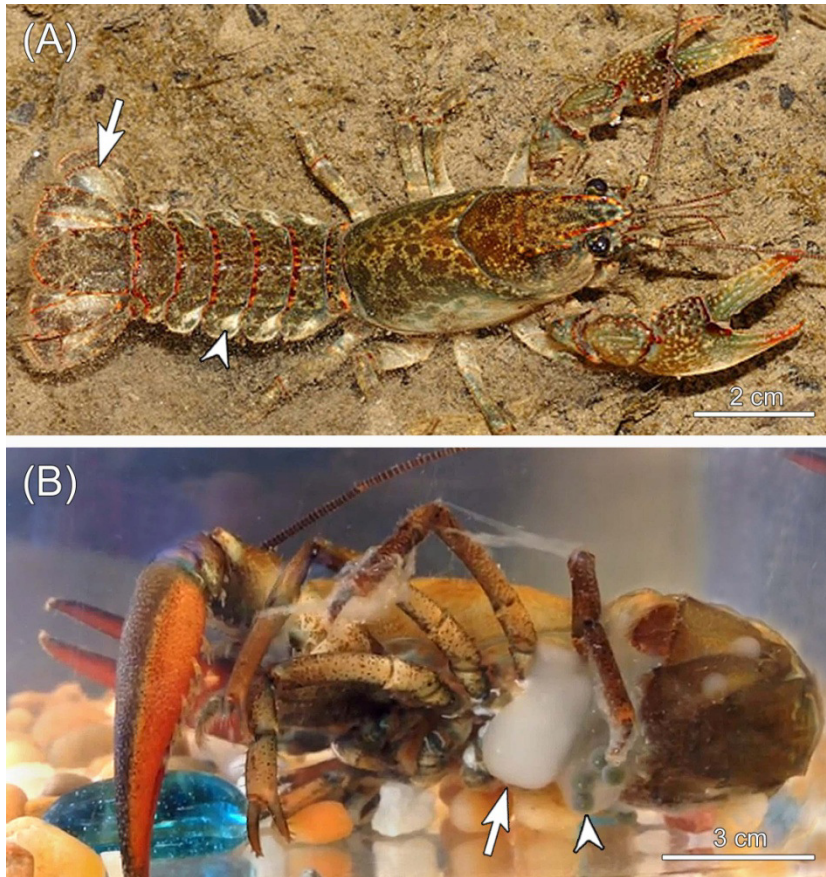

1161

1162

1163 **Fig. 4.** Glair glands and fertilization tent in crayfish. (A) Whitish glair glands in uropods

1164 (arrow) and pleonal pleura (arrowhead) of female of *Cambarus polychromatus*. Photo:

1165 Andrew Hoffman. (B) Fertilization pouch in egg-laying female of *Pacifastacus leniusculus*

1166 filled with gelatinous mass from glair glands (arrow). A tarpaulin-like sheet is formed at the

1167 contact zone between gelatinous mass and water. Arrowhead denotes eggs confined within the

1168 tent. From a video by Bat Won: <https://www.youtube.com/watch?v=Ur3iU1sbsIY>.

1169



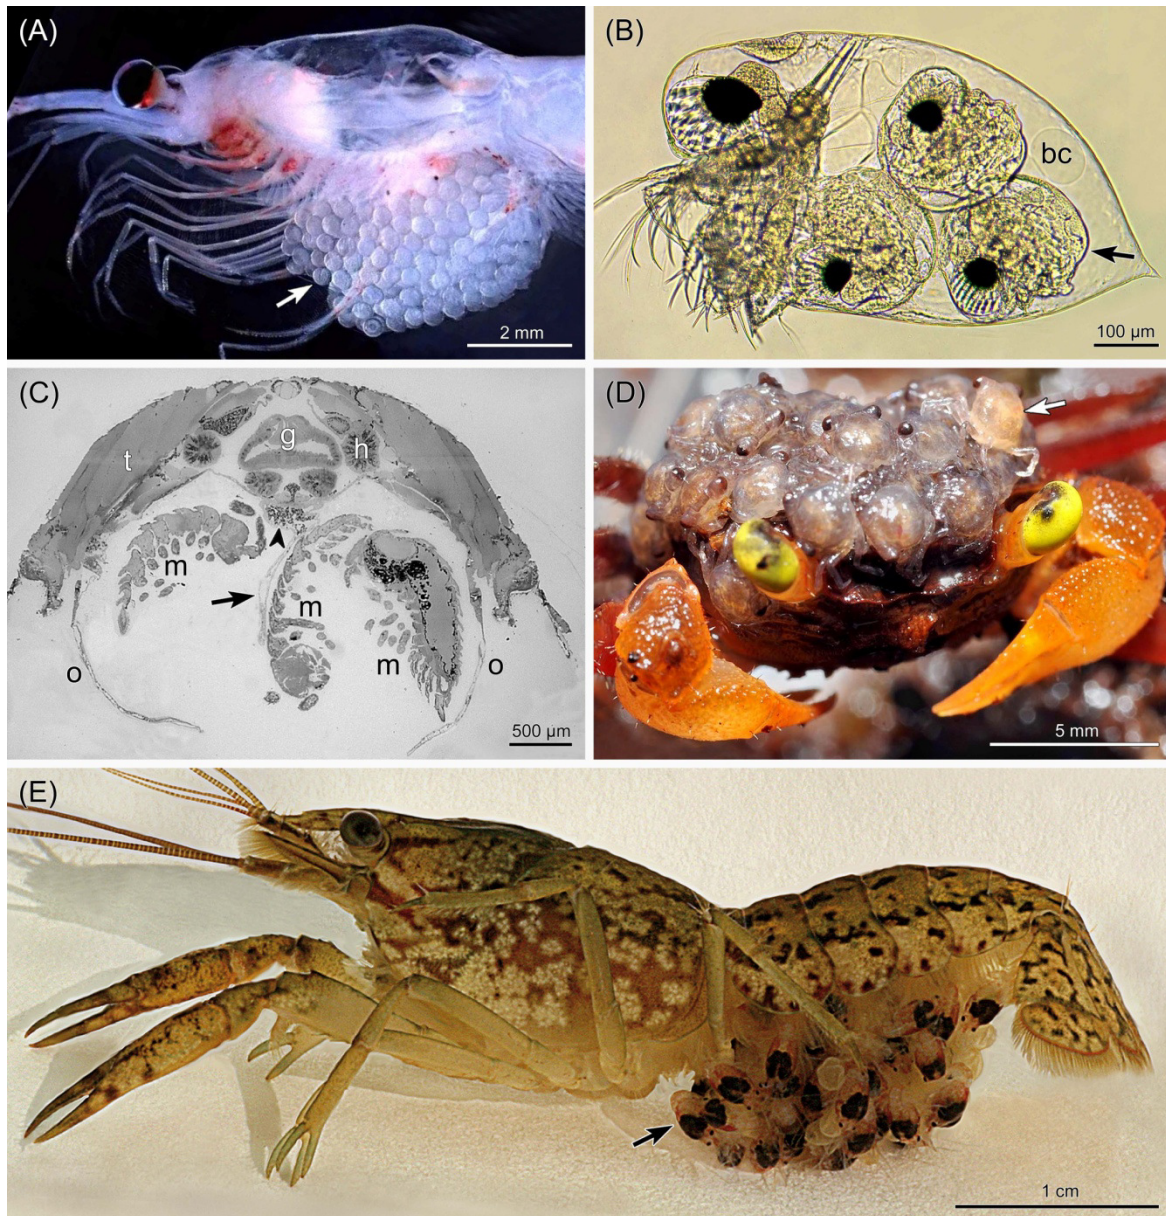

1170

1171 **Fig. 5.** Brooding of eggs and posthatching stages in specialized body compartments. (A) Krill

1172 *Nyctiphanes australis* with egg sac (arrow) between thoracopods. Photo: Anita Slotwinski.

1173 (B) Water flea *Evadne nordmanni* with advanced embryos (arrow) in dorsal brood chamber

1174 (bc). Photo: Maurice Loir. (C) Cross section through marsupium of isopod *Cylisticus*

1175 *convexus* with brooded mancas (m). The marsupium is delimited by oostegites (o) and

1176 includes liquid and nutrient secreting cotyledons (arrow). Arrowhead denotes lipid droplets in

1177 upper part of cotyledon. From Csonka *et al.* (2015). (D) Terrestrial crab *Geosesarma*

1178 *notophorum* carrying juveniles (arrow) on top of carapace. From Vogt (2013); photo: Oliver

1179 Menedoht. (E) Crayfish *Procambarus virginialis* carrying stage-2 juveniles (arrow) on

1180 pleopods. From Vogt & Tolley (2004).

1181

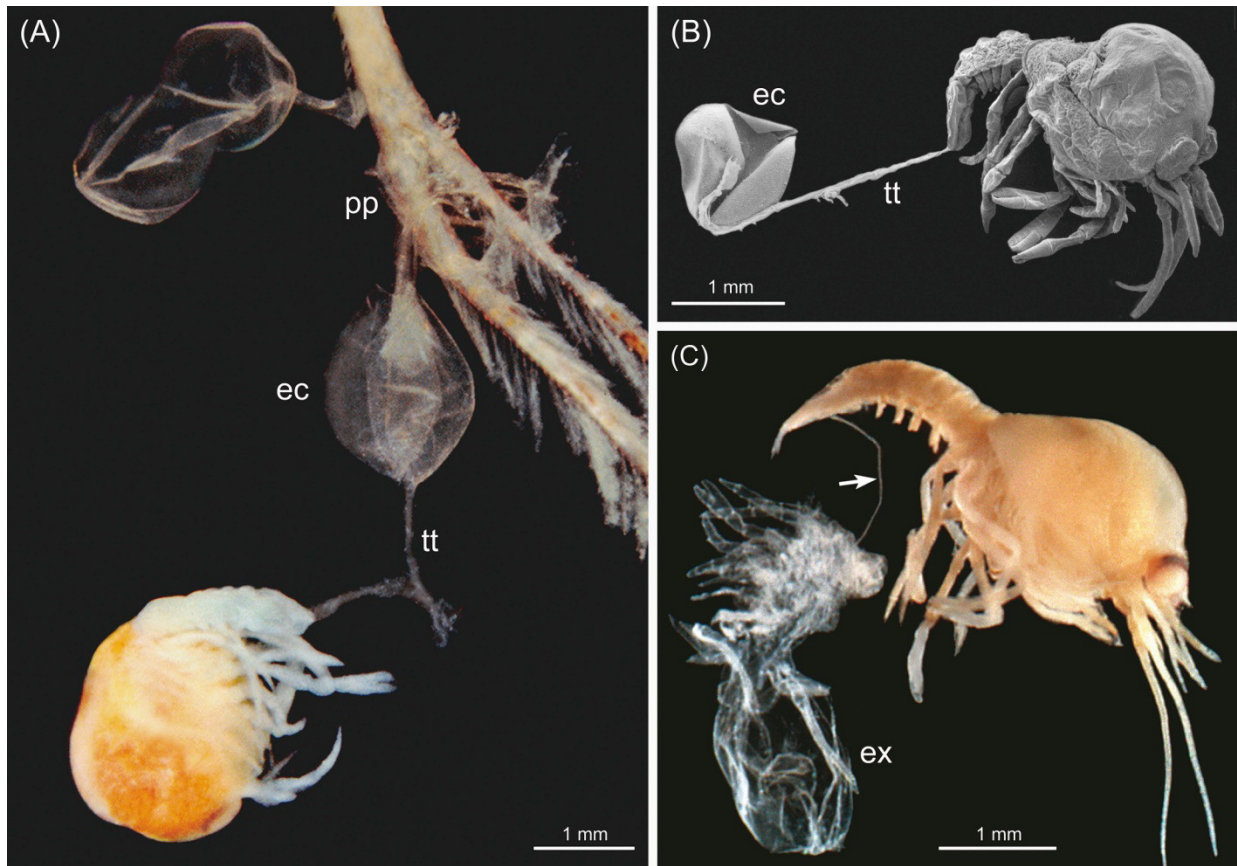

1182

1183 **Fig. 6.** Safeguarding of brooded crayfish juveniles by safety lines. (A) Safeguarding of  
1184 hatching by telson thread in *Procambarus virginalis*. The hatchling is secured to the maternal  
1185 pleopod (pp) via telson thread (tt) and egg case (ec). From Vogt & Tolley (2004). (B)  
1186 Scanning electron micrograph of telson thread connection between hatchling and egg case.  
1187 From Vogt & Tolley (2004). (C) Safeguarding of first moult by anal thread in *Procambarus*  
1188 *virginalis*. The anal thread (arrow) secures the newly emerged stage-2 juvenile to its exuvia  
1189 (ex) which in situ is hooked in pleopodal structures of the mother. From Vogt (2008).

1190

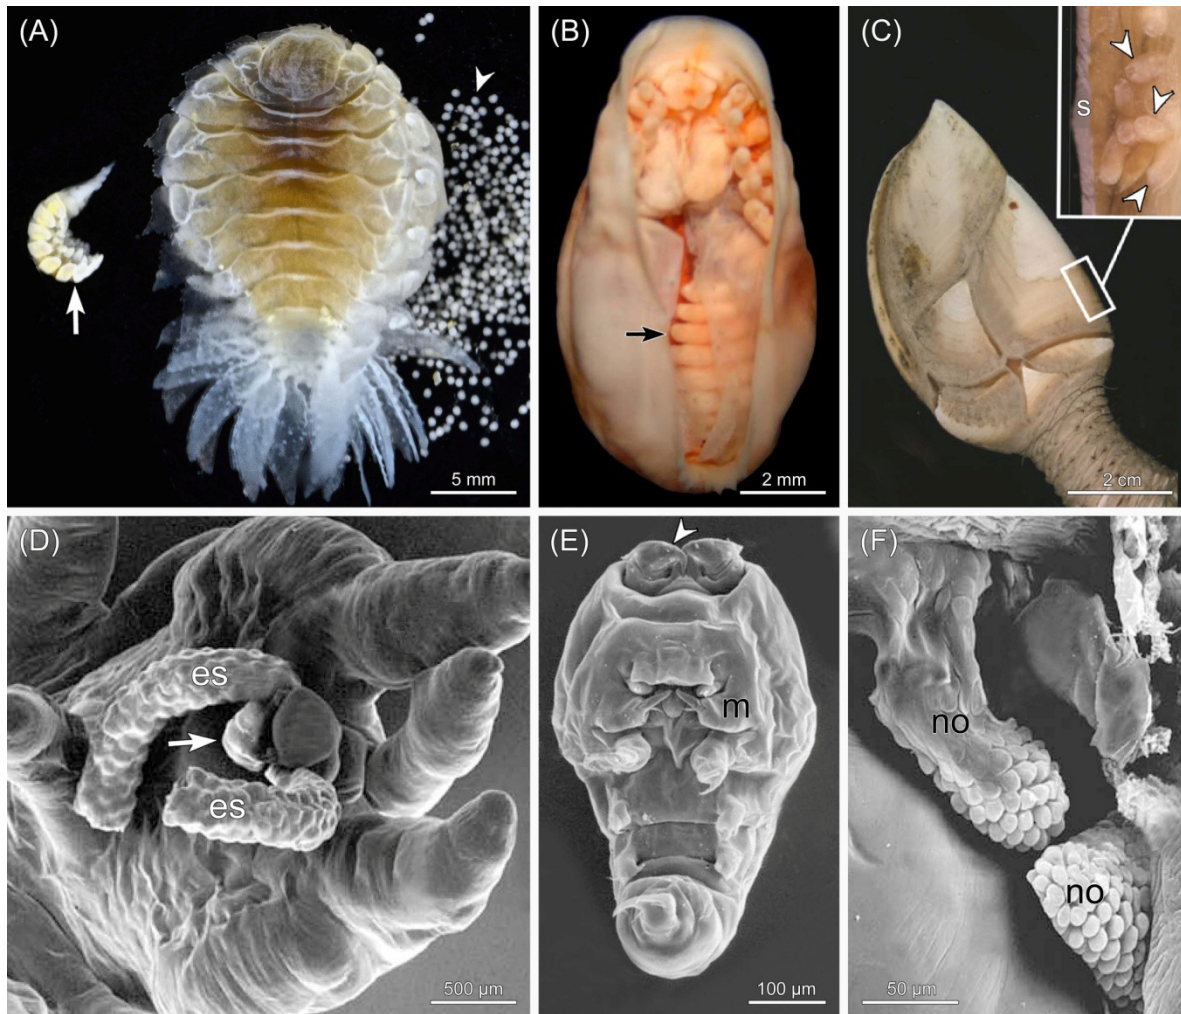

1191

1192 **Fig. 7.** Dwarf males in isopods (A, B), cirripeds (C) and copepods (D-F). (A) Ovigerous  
1193 female and male (arrow) of bopyrid *Pseudione overstreti*. Arrowhead denotes detached eggs.  
1194 From crabbytaxonomists.com. (B) Ventral view of female dajid *Zonophryxus quinquedens*  
1195 with attached male (arrow). From Raupach & Thatje (2006). (C) Female gooseneck barnacle  
1196 *Trianguloscalpellum regium* with several dwarf males (arrowheads) attached to receptacle  
1197 inside scutal edge (frame). s, scutum. From Yusa *et al.* (2012). (D) Ventral aspect of posterior  
1198 body part of female *Chondracanthus lophii* with male (arrow) attached between egg sacs (es).  
1199 From Østergaard & Boxshall (2004). (E) Close-up of male showing hooks on antennae  
1200 (arrowhead) and well developed maxillae (m). From Østergaard (2004). (F) Pinecone-like  
1201 nuptial organs (no) of female serving as holdfast and nutrient source for the male. From  
1202 Østergaard & Boxshall (2004).

1203

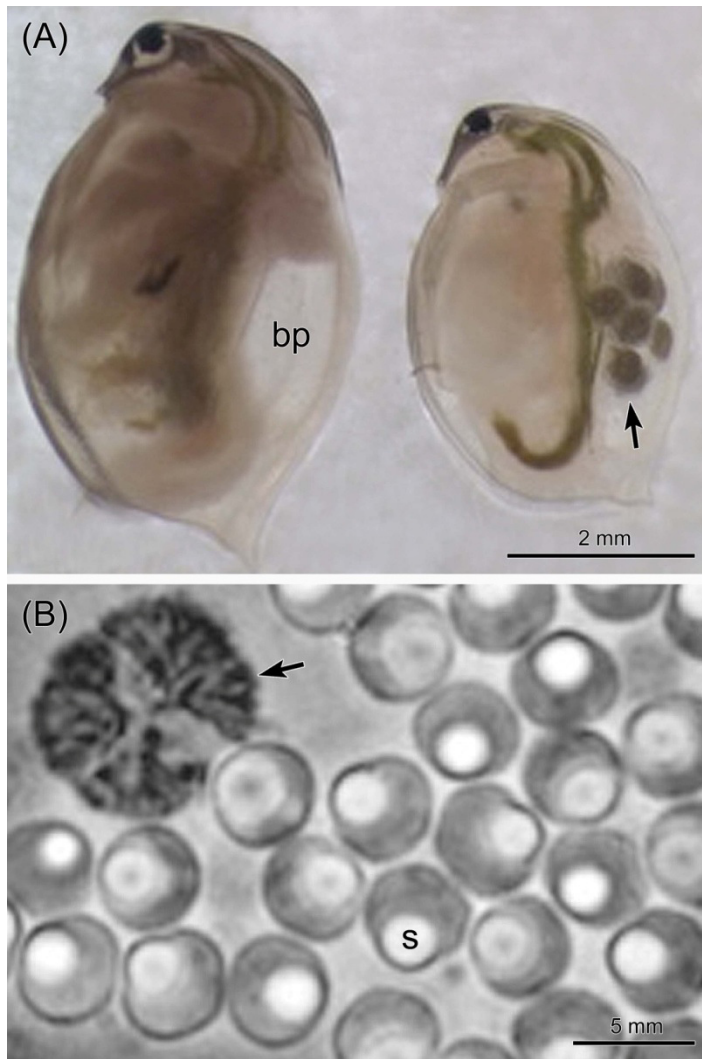

1204

1205 **Fig. 8.** Castration and gigantism in bacteria-infected water flea. (A) Comparison of healthy  
1206 (right) and *Pasteuria ramosa*-infected (left) clutch-mates of *Daphnia magna*. The healthy  
1207 specimen carries a clutch of eggs (arrow) in the brood pouch. The infected specimen is much  
1208 larger and its brood pouch (bp) is empty indicating gigantism and castration. Its haemolymph  
1209 spaces are full of bacterial spores. Photo: William A. Nelson. (B) Different life stages of  
1210 *Pasteuria ramosa*. Arrow: cauliflower-type microcolonies; s, spores. Photo: Matthew D. Hall.

1211

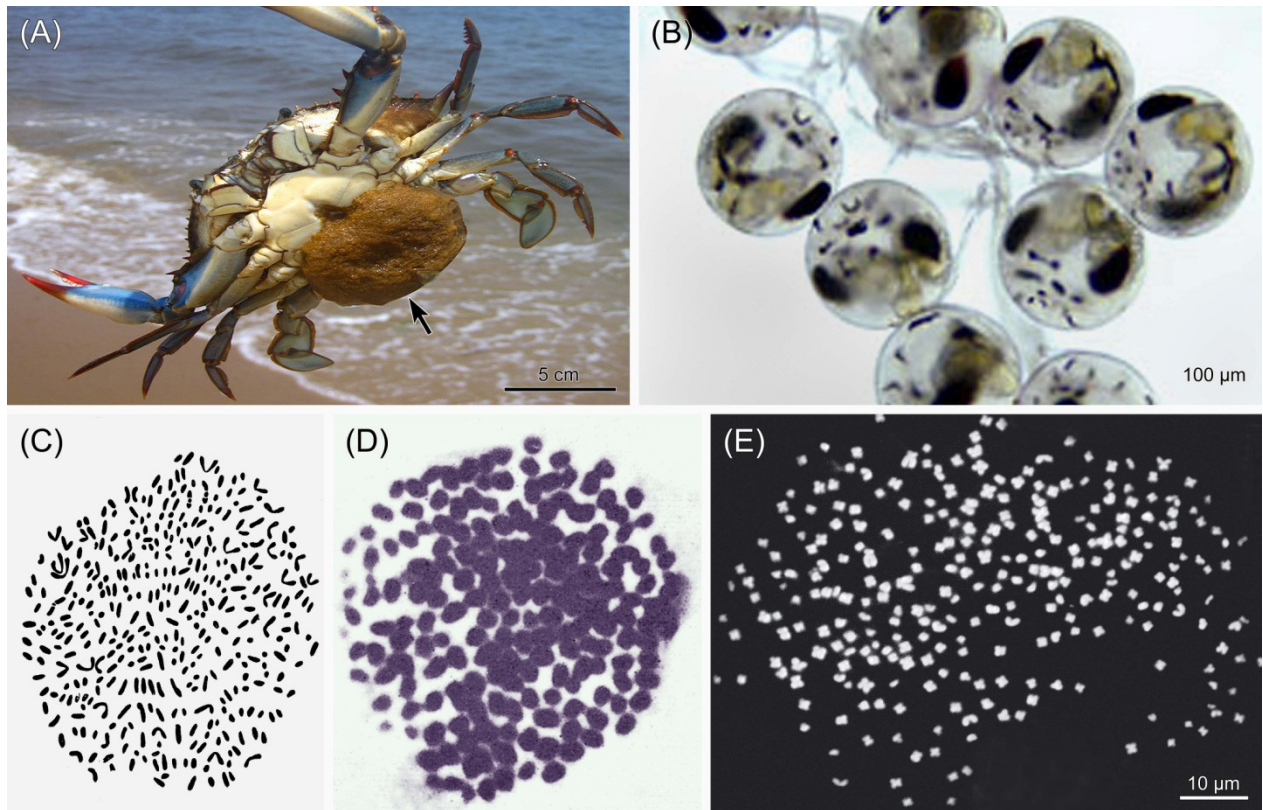

1212

1213 **Fig. 9.** Record-breaking clutch size and chromosome number in Decapoda. (A) Blue crab  
1214 *Callinectes sapidus* with "sponge" (arrow) including up to 8 million eggs. Photo: Joe  
1215 Reynolds. (B) Late eggs from sponge of blue crab. Photo: Thomas H. Shafer. (C) Drawing of  
1216 spermatogonial metaphase of crayfish *Pacifastacus leniusculus trowbridgii* ( $2n=376$   
1217 chromosomes). From Niiyama (1962). (D) Metaphase of primary spermatocyte of  
1218 *Pacifastacus leniusculus trowbridgii* ( $n=188$  chromosomes). From Niiyama (1962). (E)  
1219 Metaphase spread of embryonic cell of triploid crayfish *Procambarus virginialis* ( $3n= 276$   
1220 chromosomes). From Martin *et al.* (2015).

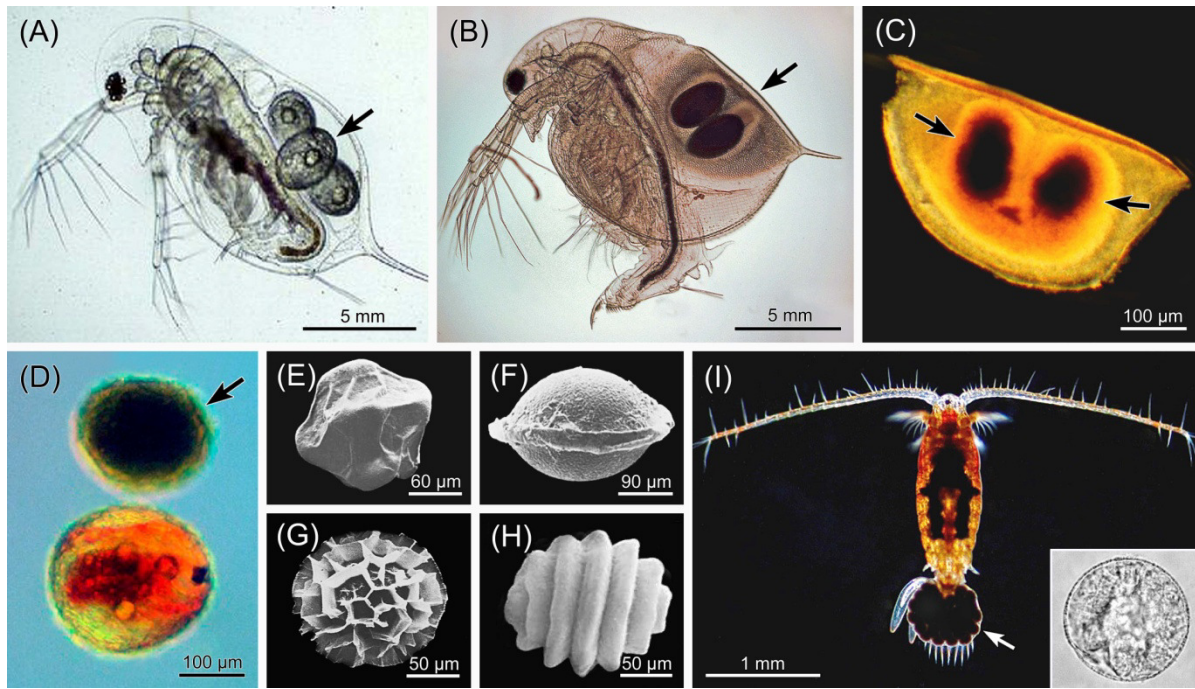

1221

1222 **Fig. 10.** Resting eggs with record breaking viability in short-lived Crustacea. (A-D) Resting  
1223 eggs and cysts and their producers in Cladocera. (A) *Daphnia galeata*, the branchiopod record  
1224 holder with a resting egg viability of 125 years. Arrow denotes brood chamber with  
1225 subitaneous eggs. From novaquatis.eawag.ch. (B) *Daphnia pulex* with almost mature  
1226 ephippium (arrow) in brood chamber. From forum.mikroskopie.com; photo: Jean-Pierre  
1227 Claes. (C) Chitinous daphnid ephippium including two resting eggs (arrows). Photo: Nelson  
1228 Hairston lab. (D) Dormant (arrow) and resurging daphnid egg. Photo: Colleen Kearns. (E-H)  
1229 Examples of specially shaped and ornamented resting eggs of Branchiopoda. From Thiery &  
1230 Gasc (1991). (E) *Branchipus schaefferi*. (F) *Tanyastix stagnalis*. (G) *Chirocephalus*  
1231 *diaphanus*. (H) *Imnadia yeyetta*. (I) Copepod *Onychodiptomus sanguineus*, the record holder  
1232 of dormant egg viability with 332 years. Arrow denotes egg sac. Photo: Ian Gardiner. Inset:  
1233 resting egg of copepod *Acartia tonsa*. From Diodato *et al.* (2006).

1234

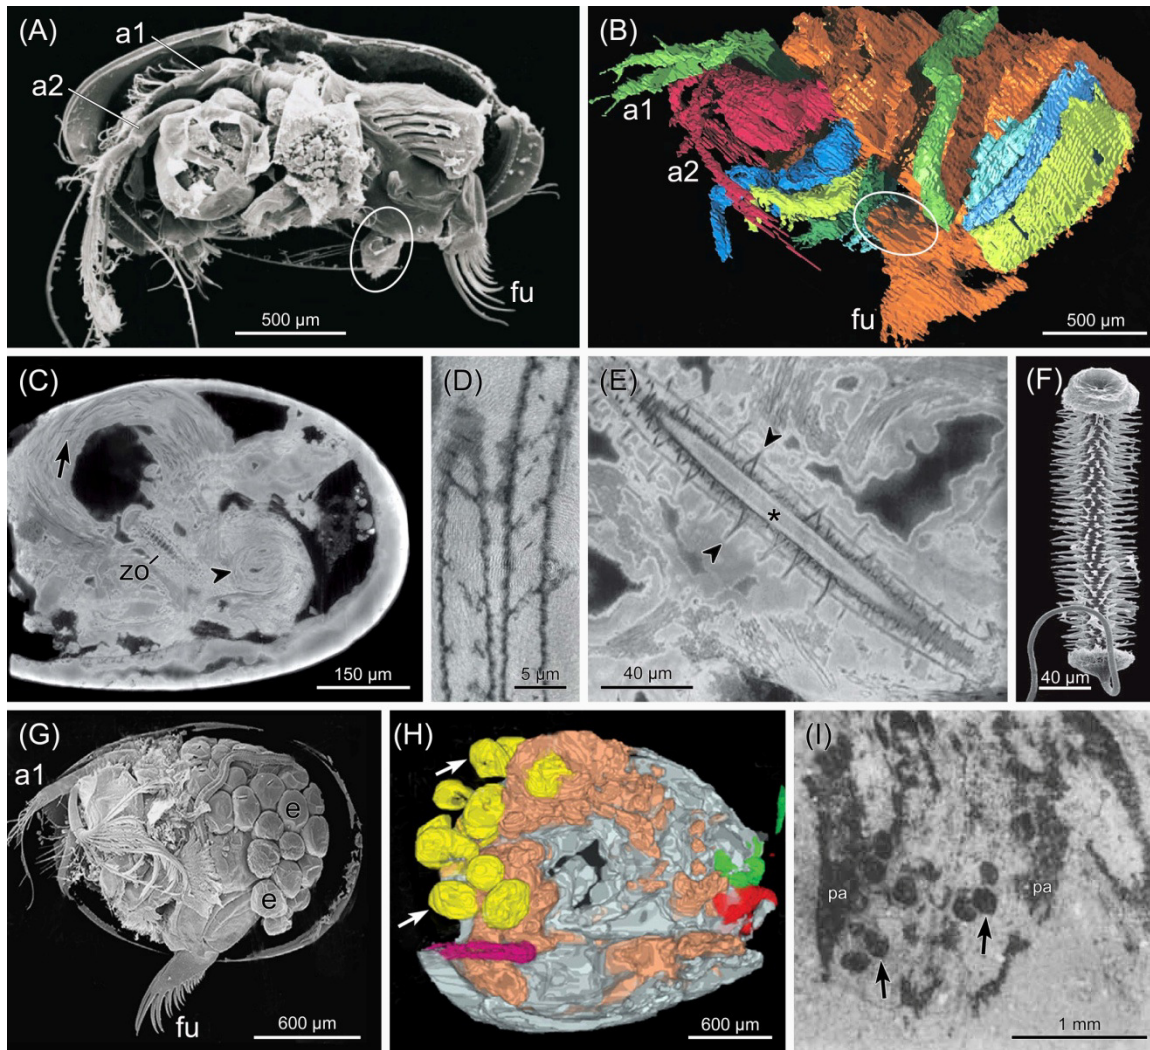

1235

1236 **Fig. 11.** Record-breaking fossil ages of reproductive structures. (A, B) Copulatory organ of  
1237 Ostracoda. From Siveter *et al.* (2003). (A) Extant mydocopid *Xenoleberis yamadai* male  
1238 showing ventrally located copulatory organ (circle). Left lateral view. a1, first antenna; a2,  
1239 second antenna; fu, furca. (B) Virtual reconstruction of 425 million years old mydocopid  
1240 *Colymbosathon eplecticos* male showing soft body parts including the copulatory organ  
1241 (circle). Left lateral view. (C-F) Sperm and sperm pump of Ostracoda. From Matzke-Karasz  
1242 *et al.* (2014). (C) Lateral tomographic slice through 16 million years old *Heterocypris collaris*  
1243 male showing bundles of giant sperm in seminal vesicle (arrow) and vas deferens  
1244 (arrowhead). zo, Zenker organ acting as sperm pump. (D) Close-up of giant spermatozoa  
1245 showing longitudinal spiralisation. (E) Close-up of Zenker organ with chitinous spines  
1246 (arrowheads) around central tube (asterisk). (F) Scanning electron micrograph of Zenker  
1247 organ of extant *Heterocypris barbara*. (G, H) Brooded embryos in Ostracoda. From Siveter *et al.*  
1248 *et al.* (2014). (G) Extant *Vargula hilgendorffii* female showing embryos (e) in brood chamber.  
1249 Left lateral view. (H) Volume-rendered image of 450 million years old *Luprisca incuba* with  
1250 brooded embryos (arrows). Oblique ventral view. (I) Ventral body part of 525 million years  
1251 old crustacean stem line derivative *Kunmingella* showing brood chamber with embryos  
1252 (arrows). The chamber is delimited by the post-antennular appendages (pa) and their setae.  
1253 From Shu *et al.* (1999).
